1           ***Streptococcus pneumoniae*, *S. mitis*, and *S. oralis* produce a phosphatidylglycerol-**  
2                           **dependent, *ltaS*-independent glycerophosphate-linked glycolipid**

3

4           Yahan Wei<sup>1</sup>, Luke R. Joyce<sup>1</sup>, Ashley M. Wall<sup>1</sup>, Ziqiang Guan<sup>2\*</sup>, and Kelli L. Palmer<sup>1\*</sup>

5

6           <sup>1</sup>Department of Biological Sciences, The University of Texas at Dallas, Richardson, Texas, USA

7           <sup>2</sup>Department of Biochemistry, Duke University Medical Center, Durham, North Carolina, USA

8

9                           \*Co-corresponding authors: [ziqiang.guan@duke.edu](mailto:ziqiang.guan@duke.edu); [kelli.palmer@utdallas.edu](mailto:kelli.palmer@utdallas.edu)

10

## 11 Abstract

12 Lipoteichoic acid (LTA) is a cell surface polymer of Gram-positive bacteria. LTA participates in  
13 host-microbe interactions including modulation of host immune reactions. It was previously  
14 reported that the major human pathogen *Streptococcus pneumoniae* and the closely related oral  
15 commensals *S. mitis* and *S. oralis* produce Type IV LTAs. Herein, using liquid  
16 chromatography/mass spectrometry (LC/MS)-based lipidomic analysis, we found that in addition  
17 to Type IV LTA biosynthetic precursors, *S. mitis*, *S. oralis*, and *S. pneumoniae* also produce  
18 glycerophosphate (Gro-P)-linked dihexosyl-diacylglycerol (DAG), which is a biosynthetic  
19 precursor of Type I LTA. Mutants in *cdsA* and *pgsA* produce dihexosyl-DAG but lack (Gro-P)-  
20 dihexosyl-DAG, indicating that the Gro-P moiety is derived from phosphatidylglycerol (PG),  
21 whose biosynthesis requires these genes. *S. mitis*, but neither *S. pneumoniae* nor *S.*  
22 *oralis*, encodes an ortholog of the PG-dependent Type I LTA synthase, *ltaS*. By heterologous  
23 expression analyses, we confirmed that *S. mitis ltaS* confers poly-(Gro-P) synthesis in  
24 both *Escherichia coli* and *Staphylococcus aureus*, and that *S. mitis ltaS* can rescue the severe  
25 growth defect of a *S. aureus ltaS* mutant. However, despite these observations, we do not detect a  
26 poly-(Gro-P) polymer in *S. mitis* using an anti-Type I LTA antibody. Moreover, (Gro-P)-linked  
27 dihexosyl-DAG is still synthesized by a *S. mitis ltaS* mutant, demonstrating that *S. mitis* LtaS  
28 does not catalyze the transfer of Gro-P from PG to dihexosyl-DAG. Finally, a *S.*  
29 *mitis ltaS* mutant has increased sensitivity to human serum, demonstrating that *ltaS* confers a  
30 beneficial but currently undefined function in *S. mitis*. Overall, our results demonstrate that *S.*  
31 *mitis*, *S. pneumoniae*, and *S. oralis* produce a (Gro-P)-linked glycolipid via a PG-  
32 dependent, *ltaS*-independent mechanism.

33

34 **Importance**

35 LTA is an important cell wall component synthesized by Gram-positive bacteria. Disruption of  
36 LTA production can confer severe physiological defects and attenuation of virulence. We report  
37 here the detection of a biosynthetic precursor of Type I LTA, in addition to the previously  
38 characterized Type IV LTA, in the total lipid extracts of *S. pneumoniae*, *S. oralis*, and *S. mitis*.  
39 Our results indicate that a novel mechanism is responsible for producing the Type I LTA  
40 intermediate. Our results are significant because they identify a novel feature of *S. pneumoniae*,  
41 *S. oralis*, and *S. mitis* glycolipid biology.

42

## 43 Introduction

44

45 The Gram-positive bacteria *Streptococcus mitis* and *S. oralis*, members of the mitis group  
46 streptococci, are among the major oral colonizers that protect against human gingivitis via  
47 production of hydrogen peroxide, neutralization of acids, and secretion of antimicrobial  
48 compounds (1–5). They are also opportunistic pathogens that are among the leading causes of  
49 community-acquired bacteremia and infective endocarditis (IE) (6–8). Our understanding of how  
50 these organisms colonize, survive, and interact with the human host in these different niches is  
51 incomplete and requires further mechanistic study.

52

53 *S. pneumoniae* also belongs to the mitis group streptococci and shares > 99% identity in 16S  
54 rRNA sequence with both *S. mitis* and *S. oralis* (9, 10). *S. pneumoniae* mainly colonizes the  
55 mucosal surfaces of the human upper respiratory tract and is a well-known human pathogen  
56 causing pneumonia, meningitis, and otitis media, among other infections, and is a significant  
57 cause of morbidity and mortality worldwide (11, 12). Though *S. mitis*, *S. oralis*, and *S.*  
58 *pneumoniae* differ in their colonization abilities and pathogenic potential, multiple studies have  
59 shown that they share some common mechanisms of host-microbe interactions. For instance, *S.*  
60 *mitis* and *S. oralis* may serve as reservoirs of pneumococcal virulence-associated and antibiotic  
61 resistance genes (13–15); and immunity against *S. mitis* provides protection against *S.*  
62 *pneumoniae* colonization (16). We recently reported that *S. mitis*, *S. oralis*, and *S. pneumoniae*  
63 scavenge intermediates of human phospholipid metabolism and utilize them to synthesize the  
64 zwitterionic phospholipid phosphatidylcholine (PC), a pathway that potentially modulates human  
65 host immune responses (17, 18).

66

67 In addition to membrane phospholipids, another Gram-positive cell wall component that plays  
68 critical roles in host-microbe interactions is the lipoteichoic acid (LTA). LTA is a membrane  
69 lipid-anchored polymer typically consisting of either glycerophosphate (Gro-P) or ribitol-  
70 phosphate (Rbo-P) repeating units (19). LTAs with different chemical structures can trigger  
71 different immune responses from the host (20–22). According to their structural differences,  
72 LTAs have been grouped into five different types, among which the LTAs produced by  
73 *Staphylococcus aureus* (Type I) and *S. pneumoniae* (Type IV) have been extensively studied  
74 (23). Pneumococcal LTA was originally identified in 1943, and was named as F-antigen at that  
75 time due to its ability to cross-react with the Forssman antigen series (24). Its repeating unit  
76 consists of residues of 2-acetamido-4-amino-2,4,6-trideoxy-D-galactose (AATGal), D-glucose,  
77 Rbo-P, N-acetyl-D-galactosamine (GalNAc), and phosphocholine (25). Genes involved in the  
78 production of Type IV LTA were summarized by Denapaite *et al.* based on genomic predictions  
79 and previous experimental studies (26). Orthologs of these genes are also present in *S. oralis* and  
80 *S. mitis* genomes, except that for most *S. mitis* and *S. oralis* strains, the glucose  
81 glycosyltransferase is substituted with a galactose glycosyltransferase (26, 27). Structural  
82 analysis of the Type IV LTA produced by *S. oralis* strain Uo5 has confirmed the replacement of  
83 glucose residues by galactose, as well as revealed other differences relative to pneumococcal  
84 LTA in the repeating unit and branching structures (28).

85

86 *S. mitis* is the primary focus of the work presented here. The chemical structures of *S. mitis* LTAs  
87 vary among different strains, and conflicting data on *S. mitis* LTAs have been reported.  
88 Bergström *et al.* found that 39 of 77 *S. mitis* strains produce polysaccharide polymers detectable

89 by monoclonal antibodies that separately target the pneumococcal Type IV LTA polymer  
90 backbone and phosphocholine residues (29). Among the remaining strains, some of them lack  
91 phosphocholine, such as *S. mitis* SK598, which produces a pneumococcal LTA-like polymer  
92 with the choline residues being replaced by ethanolamine (29, 30), while some might produce  
93 LTA of a different type. For example, another teichoic acid-like polymer consisting of repeating  
94 units of heptasaccharide phosphate was identified in cell lysates of *S. mitis* SK137 (29); however,  
95 whether this polymer is anchored to the membrane or the peptidoglycan is unknown. A few  
96 studies have reported detection of Type I-like LTA, a Gro-P polymer, from *S. mitis* clinical  
97 isolates using anti-Type I LTA antibodies (31–33). However, since these reports, species  
98 definitions among mitis group streptococci have been refined. A more recent reanalysis using the  
99 same detection technique did not detect Type I LTA in four *S. mitis* strains, including the type  
100 strain *S. mitis* ATCC 49456 (34). However, genomic analysis supports the possibility of Type I  
101 LTA synthesis in *S. mitis*, as *S. mitis* encodes an ortholog of the *S. aureus* type I LTA synthase  
102 gene, *ltaS* (26, 35). LtaS catalyzes the transfer of Gro-P from the membrane phospholipid  
103 phosphatidylglycerol (PG) and polymerizes the Gro-P units on a glycolipid anchor, forming  
104 Type I LTA (36, 37).

105

106 The goal of our study was to determine whether *S. mitis* produces multiple types of LTAs, and  
107 whether *S. mitis* *ltaS* mediates production of Type I LTA, using the type strain ATCC 49456 as a  
108 model. We used normal-phase liquid chromatography (NPLC)- electrospray ionization/mass  
109 spectrometry (ESI/MS) to analyze membrane lipids in the mitis group streptococci. This  
110 technique allows for analysis of LTA anchors and other LTA biosynthetic intermediates. We  
111 identified intermediates of Type IV LTA synthesis in *S. mitis*, *S. oralis*, and *S. pneumoniae*. To

112 our surprise, a Type I-like LTA intermediate was observed not only in *S. mitis*, which encodes  
113 *ltaS*, but also in *S. oralis* and *S. pneumoniae*, which lack *ltaS* orthologs. Moreover, while *S. mitis*  
114 ATCC 49456 *ltaS* confers poly-(Gro-P) synthesis when heterologously expressed in *Escherichia*  
115 *coli* and a *S. aureus* *ltaS*-deficient mutant, we confirm that *S. mitis* ATCC 49456 does not  
116 produce a polymer detectable by a Type I LTA antibody. Importantly, *ltaS* contributes to *S. mitis*  
117 ATCC 49456 fitness, because deletion of *ltaS* impacted growth in human serum-supplemented  
118 medium. Overall, our results demonstrate that *S. mitis*, *S. oralis*, and *S. pneumoniae* synthesize  
119 intermediates of two structurally distinct lipid-anchored polymers, one Type IV LTA, and one a  
120 (Gro-P)-containing polymer whose full structure remains to be determined.

121

## 122 **Results:**

123

124 *Mitis* group streptococci produce glycolipid intermediates of two structurally distinct LTAs

125

126 LTA is usually anchored to the membrane by a saccharide-linked diacylglycerol (DAG)  
127 glycolipid (23). Structure of the glycolipid anchor varies among different LTA types, bacterial  
128 species, and even culture conditions (38). In *S. pneumoniae*, the pseudopentasaccharide repeating  
129 units of Type IV LTA are proposed to be assembled on an undecaprenyl pyrophosphate (C<sub>55</sub>-PP)  
130 anchor, and then transferred to a glucosyl-DAG (Glc-DAG) anchor (Fig 1A) (25). In *S. aureus*,  
131 Type I LTA is typically assembled on a diglucosyl-DAG (Glc<sub>2</sub>-DAG) anchor (Fig 1A) (39).  
132 *Listeria monocytogenes* also produces Type I LTA, which is linked to a galactosyl-glucosyl-  
133 DAG (Gal-Glc-DAG) anchor (40). Thus, lipid profiling has the potential to identify LTA  
134 intermediates, thereby revealing possible types of LTAs produced by a bacterium. To perform

135 lipidomic analysis of mitis group streptococci, total lipids were extracted from bacterial cultures  
136 with a modified acidic Bligh-Dyer method and analyzed with NPLC-ESI/MS (41). We analyzed  
137 the type strain of *S. mitis* (ATCC 49456, referred to as SM61 hereafter), *S. oralis* (ATCC 35037),  
138 two clinically isolated *S. pneumoniae* strains (D39 and TIGR4), and *Streptococcus* sp. 1643  
139 (referred to as SM43 hereafter), a human endocarditis isolate that was clinically identified as *S.*  
140 *mitis* but shares higher genomic identity with *S. oralis* (Table 1) (18, 42).

141

142 Three C<sub>55</sub>-PP-linked intermediates of Type IV LTA biosynthesis were detected in all strains  
143 analyzed. Specifically, these intermediates are C<sub>55</sub>-PP-linked AATGal ([M-H]<sup>-</sup> at *m/z* 1111.7 of  
144 Fig. 1B, left), C<sub>55</sub>-PP-AATGal-Gal ([M-H]<sup>-</sup> at *m/z* 1273.7 of Fig. 1B, middle), and C<sub>55</sub>-PP-  
145 AATGal-Gal-(Rbo-P) ([M-H]<sup>-</sup> at *m/z* 1487.7 of Fig. 1B, right). Identifications of these species  
146 are supported by the exact mass measurement and tandem mass spectrometry (MS/MS). For  
147 example, Fig. 1C shows MS/MS of the doubly deprotonated [M-2H]<sup>2-</sup> ion at *m/z* 743.4 for C<sub>55</sub>-  
148 PP-AATGal-Gal-(Rbo-P) along with the fragmentation scheme. In addition, we also detected  
149 (Gro-P)-dihexosyl-DAG ([M-H]<sup>-</sup> at *m/z* 1071.6 of Fig. 1D), an intermediate that would be  
150 expected for Type I LTA. The exact mass measurement (*m/z* 1071.620) is consistent with the  
151 calculated [M-H]<sup>-</sup> ion mass (*m/z* 1071.624) of (Gro-P)-dihexosyl-DAG containing C16:0 and  
152 C18:1 acyl chains. Furthermore, MS/MS of [M-H]<sup>-</sup> ion at *m/z* 1071.6 for (Gro-P)-dihexosyl-  
153 DAG (16:0/18:1) along with the fragmentation scheme are shown in Fig 1D. The  
154 stereochemistry of the two hexoses cannot be discerned by MS/MS.

155

156 To confirm the possible monosaccharide identity of the DAG-linked sugars, *in silico* analyses  
157 were performed to identify orthologs of known glycolipid biosynthetic genes in the genomes of



158 the tested strains. *S. pneumoniae* produces the glycolipid Gal-Glc-DAG (43), for which the  
159 biosynthetic genes have been partially identified. These genes can be separated into two major  
160 groups corresponding to the biosynthetic steps they are responsible for: 1) production of  
161 nucleotide-activated sugars, and 2) transferring of the activated sugar moieties to DAG (38). As  
162 shown in Table 2, these genes include: confirmed uridine diphosphate glucose (UDP-Glc)  
163 production gene *pgm* (encoding  $\alpha$ -phosphoglucomutase) and *galU* (encoding UTP: $\alpha$ -glucose-1-  
164 phosphate uridylyltransferase) (44); Leloir pathway genes that are proposed to produce uridine  
165 diphosphate galactose (UDP-Gal), specifically *galK* (encoding galactokinase) and *galT2*  
166 (encoding galactose-1-phosphate uridylyltransferase 2) (45, 46); and glycosyltransferases  
167 encoded by genes Spr0982 and *cpoA* which sequentially transfer Glc and Gal residues to DAG,  
168 respectively (47, 48). *S. pneumoniae* R6 is an avirulent and unencapsulated derivative of *S.*  
169 *pneumoniae* D39 (49). These two strains share the same glycolipid biosynthetic genes. Using *S.*  
170 *pneumoniae* R6 as reference, orthologs of Gal-Glc-DAG biosynthetic genes with  $\geq 87\%$  amino  
171 acid identity were identified in the genomes of SM61, *S. oralis* ATCC 35037, SM43, and *S.*  
172 *pneumoniae* TIGR4 (Table 2). This analysis suggests that the dihexosyl-DAG detected in our  
173 experiments is likely to be Gal-Glc-DAG.

174

175 *Biosynthesis of (Gro-P)-dihexosyl-DAG requires phosphatidylglycerol in mitis group*  
176 *streptococci*

177

178 In *S. aureus*, the Gro-P of Type I LTA is produced from hydrolyzation of membrane PG (36), a  
179 process that is also required for Gro-P modification of streptococcal rhamnose-containing cell  
180 wall polysaccharides (50). To verify whether PG is the source of Gro-P for (Gro-P)-dihexosyl-

181 DAG biosynthesis in mitis group streptococci, we analyzed the lipid profiles of *cdsA* and *pgsA*  
182 mutants. The gene *cdsA* is required for the synthesis of CDP-DAG, which is then converted by  
183 PgsA to produce phosphatidylglycerophosphate (PGP), the immediate precursor of PG (Fig. 1A)  
184 (18, 41). We previously reported that *cdsA* deletion mutants of *S. mitis* and *S. oralis* do not  
185 synthesize PG, nor does a *pgsA* deletion mutant of SM43 (18, 41) (Fig. 2). Thus, lipid anchor  
186 profiles of SM43 *cdsA* and *pgsA* deletion mutants were analyzed. While the dihexosyl-DAG  
187 glycolipid anchor (such as [M+Cl]<sup>-</sup> at *m/z* 953.6 of Fig. 2) is observed in the wild type,  $\Delta cdsA$ ,  
188 and  $\Delta pgsA$  strains, the (Gro-P)-linked dihexosyl-DAG (such as [M-H]<sup>-</sup> at *m/z* 1071.6 of Fig. 2) is  
189 missing from the  $\Delta cdsA$  and  $\Delta pgsA$  strains. Identical anchor profiles were observed for the SM61  
190 *cdsA* mutant (Table 1). These results demonstrate that *cdsA* and *pgsA*, or more specifically the  
191 ability to synthesize PG, are required for the biosynthesis of (Gro-P)-dihexosyl-DAG in SM61  
192 and SM43.

193

194 *S. mitis*, *S. oralis*, and *S. pneumoniae* cell extracts do not react with a Type I LTA antibody

195

196 Currently, enzymes known to transfer Gro-P from PG for Gro-P polymer synthesis or Gro-P  
197 modification include 1) *S. aureus* LtaS, the Type I LTA synthase that produces poly-(Gro-P)  
198 (36), 2) *L. monocytogenes* LtaP, the Type I LTA primase that has a very similar overall structure  
199 and active site sequences with LtaS, except links only the first Gro-P unit to the glycolipid  
200 anchor (35, 40), and 3) the recently identified streptococcal Gro-P transferase GacH that links  
201 Gro-P to cell wall-attached glycopolymers (50). Bioinformatic analyses predict no orthologs of  
202 either *ltaP* or *gacH* in the genomes of the mitis group streptococci assessed here, yet an ortholog  
203 of *ltaS* is present in *S. mitis*, as previously reported (35).

204

205 If *S. mitis ltaS* functions the same as its ortholog in Type I LTA-producing bacteria like *S.*  
206 *aureus*, polymers of Gro-P will be produced and may be detectable using an anti-Type I LTA  
207 antibody. Western blot analysis using a previously described anti-Type I LTA antibody was  
208 conducted for SM61, SM43, *S. oralis* ATCC 35037 and *S. pneumoniae* strains. No signal was  
209 detected from cell lysates of these strains (Fig. 3), nor from cell lysates of SM61 that over-  
210 expresses *ltaS in trans* from an anhydrotetracycline-inducible vector (Fig. S1). These results are  
211 in accordance with previous observations of no immunoluminescent detection of Gro-P polymers  
212 in SM61 (34). The validity of the antibody was confirmed by positive signals detected from cell  
213 lysates of *S. agalactiae*, *S. pyogenes*, and *S. aureus*, all three of which produce Type I LTA (Fig.  
214 3) (36, 51, 52). Interestingly, no signal was detected from cell lysate of *Enterococcus faecalis*  
215 OG1RF (Fig. 3), another bacterium known to produce Type I LTA (53, 54), which, as reported  
216 previously, is poorly recognized by the anti-Type I LTA antibody (55).

217

218 *S. mitis LtaS mediates production of poly-(Gro-P) in an E. coli heterologous host*

219

220 For the following analyses, the *S. mitis* type strain ATCC 49456 (SM61) was used as a model,  
221 and its *ltaS* ortholog (SM12261\_RS03435) was renamed *ltaS*. We heterologously expressed *S.*  
222 *mitis ltaS* in *E. coli* to verify the function of the gene. This approach was previously used in  
223 studies of *S. aureus ltaS* (36). Plasmid pET-*ltaS* (Table 3) was constructed so that the expression  
224 of *S. mitis ltaS* could be induced with IPTG in *E. coli*. As shown in Fig. 4A, with the addition of  
225 IPTG, detectable bands produced by anti-Type I LTA antibody targeting were observed for *E.*

226 *coli* (pET-ltaS), demonstrating that *S. mitis ltaS* is sufficient to mediate the production of poly-  
227 (Gro-P).

228

229 *S. mitis ltaS* complements a *S. aureus ltaS* mutant for Type I LTA production

230

231 In *S. aureus*, LtaS is required for proper cell division and efficient cell growth at 37°C (36, 56).

232 To further confirm the physiological function of *S. mitis ltaS* in Gram-positive cells, we

233 expressed it in a previously reported *S. aureus* strain that has its native *ltaS* gene under the

234 control of an IPTG-inducible promoter (strain ANG499). Without IPTG, ANG499 is deficient

235 for Type I LTA production and has a growth defect when cultured at 37°C (36, 56). *S. mitis ltaS*

236 was introduced into ANG499 by the plasmid pitetR-ltaS (Table 3), which has the *S. mitis ltaS*

237 coding region under the control of the tetracycline-inducible promoter  $P_{xyl/tet}$ . Addition of

238 anhydrotetracycline (ATC) induces expression of *S. mitis ltaS*. Note that we included ATC in all

239 experimental cultures described below, because we observed an ATC-dependent growth defect

240 that confounded direct comparison of ATC+/ATC- cultures (Fig. S2).

241

242 As expected, ANG499 with the empty plasmid vector pitetR grew more slowly and reached a

243 lower final OD<sub>600nm</sub> value when cultured without IPTG as compared to with IPTG (Fig. 4B). As

244 expected, Type I LTA production by *S. aureus* LtaS was induced by IPTG, confirmed by

245 Western blot analysis (Fig. 4C) and detection of Type I LTA intermediates (Gro-P)<sub>2</sub>-Glc<sub>2</sub>-DAG

246 ([M-H]<sup>-</sup> ion at *m/z* 1214.6 of Fig. 5A) and alanine-linked (Gro-P)<sub>2</sub>-Glc<sub>2</sub>-DAG ([M-H]<sup>-</sup> ion at *m/z*

247 1285.7 of Fig. S3). Strikingly, the growth of ANG499 was also rescued by the expression of *S.*

248 *mitis ltaS* from pitetR-ltaS (Fig. 4B), and Type I LTA production was observed, as shown in

249 Western blot (Fig. 4C) and lipidomic analysis (Fig. 5A & Fig. S3). These data demonstrate that  
250 *S. mitis ltaS* can complement the function of *S. aureus ltaS* and promote production of Type I  
251 LTA in *S. aureus*. Surprisingly, (Gro-P)-Glc<sub>2</sub>-DAG ([M-H]<sup>-</sup> ion at *m/z* 1059.6 of Fig. 5B) was  
252 detected at comparable levels from all *S. aureus* cultures, including the natively *ltaS*-deficient  
253 strain in the absence of IPTG induction.

254

255 *S. mitis* lacking *ltaS* has increased serum susceptibility

256

257 To investigate functions of *ltaS* in *S. mitis*, *ltaS* was deleted and exchanged for the erythromycin  
258 resistance marker *ermB*, generating *S. mitis ΔltaS*. Of note, (Gro-P)-dihexosyl-DAG was still  
259 detected in the *S. mitis ΔltaS* strain, demonstrating that LtaS is not required for the addition of the  
260 Gro-P unit to the dihexosyl-DAG (Table 1).

261

262 Unlike *S. aureus*, which requires *ltaS* for efficient growth, deletion of *ltaS* in *S. mitis* does not  
263 confer a growth defect under laboratory culturing conditions. Specifically, when growing in  
264 Todd Hewitt Broth at 37°C, the doubling time of *ΔltaS* is 39.8 (± 3.7) minutes, which is not  
265 significantly different from the 40.2 (± 3.5) minute doubling time of wild type *S. mitis* (Fig. S4).  
266 Considering that the growth deficiency of *S. aureus* lacking *ltaS* could be mitigated by culturing  
267 at a lower temperature (56), the growth of *S. mitis* wild type and *ΔltaS* strains cultured at a higher  
268 temperature was measured, to determine whether the *ltaS* mutant was compromised for  
269 temperature-related stresses. The temperature 42°C was chosen as a representative of fever. Both  
270 wild type and *ΔltaS* strains exhibited slower growth at 42°C compared to 37°C; however, no  
271 significant difference in growth rate was observed between the strains (46.2 (± 3.0) and 47.4 (±

272 3.8) minute doubling times for the wild type and *ΔltaS* strains, respectively). Moreover, no  
273 difference in susceptibilities to antibiotics targeting peptidoglycan biosynthesis, membrane  
274 integrity, and protein synthesis were observed (Table S1). Thus, under these laboratory culture  
275 conditions, *ltaS* is not essential for the growth of *S. mitis*.

276

277 In addition, a potential role for *ltaS* in host-microbe interactions was investigated. As an oral  
278 commensal, the environment *S. mitis* colonizes is exposed to human gingival crevicular fluid,  
279 which is an extrudant of serum with lower concentrations of complement (57). Moreover, when  
280 invading the bloodstream and causing bacteremia and infectious endocarditis, *S. mitis* is  
281 constantly exposed to blood. Thus, human serum is a useful medium component for laboratory  
282 reconstruction of the host growth conditions. Supplementation of human serum into chemically  
283 defined medium (CDM) promotes the growth of *S. mitis* compared to non-supplemented CDM  
284 (Fig. 6). Deletion of *ltaS* does not confer a significant difference in growth in Todd Hewitt broth  
285 or un-supplemented CDM; but does result in a significant growth deficiency in human serum-  
286 supplemented CDM, and makes *S. mitis* more sensitive to the killing effect of complete serum  
287 (Fig. 6). These results suggest that although *ltaS* is not required for growth of *S. mitis* under  
288 laboratory conditions, it is involved in interactions with human serum factors. Further  
289 investigation is needed to elucidate such interactions.

290

## 291 **Discussion:**

292

293 In this work, we used NPLC-ESI/MS to analyze the glycolipid profiles of *S. mitis*, *S. oralis*, and  
294 *S. pneumoniae* strains. For all of the tested strains, biosynthetic intermediates of two structurally

295 different LTAs were detected (Fig. 1 and Table 1). Firstly, consistent with literature, the  
296 biosynthetic intermediates of the Type IV LTA were detected, which is in agreement with  
297 genomic analysis of the biosynthetic genes (26). The second distinct LTA is indicated by the  
298 detection of (Gro-P)-dihexosyl-DAG, which is similar to Type I LTA polymers and unexpected  
299 based on previous reports, and thus has been the focus of this study.

300

301 Based on genomic analysis, we proposed that the newly identified (Gro-P)-dihexosyl-DAG is  
302 structured as (Gro-P)-Gal-Glc-DAG. The glycolipid Gal-Glc-DAG has been reported as the  
303 dominant glycolipid species in *S. pneumoniae*, and our prediction is in accordance with this  
304 previous report (43). However, the full pathway for Gal-Glc-DAG synthesis has not been fully  
305 experimentally verified in the mitis group streptococci; the stereochemistry of the hexoses  
306 requires further confirmation with structural analysis, such as with NMR.

307

308 The PG-dependent (Gro-P)-dihexosyl-DAG biosynthetic process in *S. mitis* was then  
309 investigated, which led to the main focus of this study, functional verification of *S. mitis ltaS*.  
310 Through heterologous expression, we confirmed that *S. mitis ltaS* could directly synthesize Gro-  
311 P polymers in both *E. coli* and *S. aureus*. However, it appeared that *S. mitis* LtaS functions  
312 somewhat differently from *S. aureus* LtaS, as the expression of *S. mitis ltaS* does not fully  
313 complement the growth deficiency and the amount of Type I LTA produced (Fig. 4 B & C),  
314 which is not unexpected considering that *S. mitis* and *S. aureus* LtaS share only 38% sequence  
315 identity (26).

316

317 We did not detect a Gro-P polymer in wild type *S. mitis* using Western blot analysis.  
318 Explanations as to why we could not detect the polymer include: 1) *S. mitis* does not produce the  
319 Gro-P polymer; instead, (Gro-P)-dihexosyl-DAG is the complete and final product; 2) a very low  
320 amount of the Gro-P polymer is produced under the culture conditions investigated here; or 3)  
321 unique structural modifications on the Gro-P polymer hinder antibody recognition. Further large-  
322 scale purification and structural analysis of the (Gro-P)-dihexosyl-DAG-containing polymer  
323 produced by mitis group streptococci is required.

324  
325 The findings that (Gro-P)-dihexosyl-DAG is still present in *S. mitis* *AltaS*, as well as in *S. oralis*  
326 and *S. pneumoniae*, which are species that encode no orthologs of *ltaS*, suggest the existence of  
327 an unknown PG-dependent Gro-P transferase in these species that is responsible for the synthesis  
328 of (Gro-P)-dihexosyl-DAG. Unexpectedly, (Gro-P)-Glc<sub>2</sub>-DAG is also seen in *S. aureus* deficient  
329 for *ltaS*, suggesting that an unidentified Gro-P biosynthetic enzyme(s) or biological process(es)  
330 may exist in *S. aureus* as well, but this is more speculative.

331  
332 In other Gram-positive pathogens that synthesize Type I LTA, LtaS and its product, LTA, are  
333 essential for proper cell division (40, 56, 58, 59). Inhibiting the function of LtaS is effective in  
334 extending the survival of *S. aureus* infected mice (60) and sensitizing multi-drug resistant *E.*  
335 *faecium* to antibiotics (61). Though *S. mitis* *ltaS* is not essential for proper growth of the  
336 bacterium in normal laboratory media, nor for synthesizing (Gro-P)-dihexosyl-DAG, it does  
337 provide some advantage to *S. mitis* when human serum is present in the culture media.

338



339 In summary, we provide evidence that a Type I-like LTA might co-exist with Type IV LTA in *S.*  
340 *mitis*, *S. oralis*, and *S. pneumoniae*, and queried the role of *ltaS* in this process in a model *S. mitis*  
341 strain. To our knowledge, there is only one previous report which documents a bacterial species  
342 producing two structurally different LTAs, in *S. suis*, an invasive pathogen of pigs (62). Our  
343 lipidomic and genomic studies show that that we have an incomplete understanding of  
344 glycolipids and LTAs in mitis group streptococci, and their potential roles in host-microbe  
345 interactions.

346

## 347 **Materials and methods**

348

### 349 *Bacterial strains and growth conditions*

350

351 Unless indicated, *E. coli* were grown in Luria-Bertani (LB) medium, *Streptococcus* strains were  
352 grown in Todd Hewitt (TH) medium (BD Biosciences) with *S. pneumoniae* grown in TH  
353 medium supplemented with 0.5% yeast extract (BD Biosciences), and *E. faecalis* and *S. aureus*  
354 were grown in Tryptic Soy (TS) medium (BD Biosciences). All bacterial cultures were incubated  
355 at 37°C, unless otherwise noted. Streptococci were cultured with 5% CO<sub>2</sub>. Chemically defined  
356 medium (CDM) was made as previously described, with the addition of 0.5 mM choline (63).  
357 Human serum-supplemented medium was made through addition of complete human serum  
358 (Sigma Aldrich) into CDM to a final concentration of 5% (v/v). Bacterial strains and plasmids as  
359 well as the concentrations of antibiotics and expression-inducing reagents used in this research  
360 are listed in Table 3.

361

362 *Sequence analysis*

363

364 Orthologs of glycolipid biosynthetic genes were identified through using the BLASTp function  
365 against the NCBI database (64). Specifically, genes of *S. pneumoniae* R6 (NC\_003098.1) were  
366 used as reference. The encoded amino acid sequences were input into BLASTp to search against  
367 non-redundant protein database of *S. mitis* ATCC 49456 (taxid: 246201), *S. oralis* ATCC 35037  
368 (taxid: 655813), *Streptococcus* sp. 1643 (taxid: 2576376), and *S. pneumoniae* TIGR4 (taxid:  
369 170187) individually. The *ltaS* (SM12261\_RS03435) ortholog in *S. mitis* ATCC 49456 was  
370 identified similarly, with the amino acid sequence of *S. aureus* LtaS (SAV0719) (36) being the  
371 reference. Orthologs were determined by query coverage > 95% and E-value < 10<sup>-120</sup>.

372

373 *Mutant generation*

374

375 Deletion of *cdsA* (SM12261\_RS08390) in *S. mitis* ATCC 49456 was conducted as previously  
376 described (65–67). Briefly, approximately 2 kb flanking regions on either side of *cdsA* were  
377 amplified using Phusion polymerase (Thermo Fisher). PCR products were digested with  
378 restriction enzyme XmaI (New England Biolabs) and ligated with T4 DNA ligase (New England  
379 Biolabs). Ligated products were amplified using primers 61cdsA\_Up\_F and 61cdsA\_Dwn\_R  
380 (Table S2), followed by gel extraction with the QIAquick Gel Extraction Kit (Qiagen) per the  
381 manufacturer's instruction. The linear construct was transformed into *S. mitis* via natural  
382 transformation as described previously (67). The  $\Delta$ *cdsA* mutant was selected with 35 µg/ml  
383 daptomycin and confirmed with Sanger sequencing (Massachusetts General Hospital DNA Core)  
384 of the PCR product of the *cdsA* deletion region.

385

386 Deletion of *ltaS* in *S. mitis* ATCC 49456 was conducted similarly with some slight  
387 modifications. Specifically, a 1 kb DNA fragment containing *ermB* was generated through PCR  
388 amplification using plasmid pMSP3535 as the template (68). Then, splicing by overlap extension  
389 PCR was performed to produce a 5 kb amplicon that sequentially contained a 2 kb fragment  
390 upstream of *ltaS*, a 1 kb *ermB*-containing fragment in reverse orientation, and a 2 kb fragment  
391 downstream of *ltaS*. The PCR product was analyzed on a 0.8% agarose gel and extracted using  
392 the QIAquick Gel Extraction Kit (Qiagen) per the manufacturer's instruction. Transformation of  
393 the 5 kb amplicon into *S. mitis* was performed as described previously (67). The *ΔltaS* mutant  
394 was selected with 20 μg/ml erythromycin and confirmed with Illumina genome sequencing  
395 (UTD Genome Core Facility).

396

### 397 *Plasmid construction*

398

399 Plasmids used in this research are listed in Table 3 with description of their functions. All  
400 primers used in this research are listed in Table S2.

401

402 The shuttle plasmid pABG5 was used for heterologous gene expression in Gram-positive  
403 bacteria (69). Specifically, the DNA fragment containing the *S. mitis ltaS* coding region was  
404 amplified using primers LtaS\_F and LtaS\_R, and the pABG5 plasmid backbone was linearized  
405 through PCR using primers pABG5-5 and pABG5-3. Gibson assembly was conducted per the  
406 manufacturer's instructions (NEBuilder HiFi DNA Assembly Master Mix, New England  
407 Biolabs), followed by transformation of the product into *E.coli* DH5α. The pABG5 with *ltaS*

408 insert was further linearized with primers YW55 and YW56 and ligated with an 848 bp DNA  
409 fragment via Gibson assembly, producing the plasmid pitetR-ltaS. The 848 bp fragment  
410 contained a tetracycline-controlled promoter  $P_{xyl/tet}$  and the tetracycline repressor gene *tetR* in  
411 reverse orientation. Insertion of this 848 bp fragment immediately upstream of the *ltaS* coding  
412 region makes *ltaS* expression inducible by anhydrotetracycline (ATC) addition. Sequence of the  
413 848 bp fragment was obtained from the Addgene sequence database (70), and the fragment was  
414 synthesized commercially (Integrated DNA Technologies). Induced production of the target gene  
415 *ltaS* was confirmed with Western blot. The empty vector control pitetR was constructed via  
416 linearization of pitetR-ltaS with PCR using primers YW58 and YW59, followed by Gibson  
417 assembly for gap closure. The removal of the *ltaS* coding region was confirmed with Sanger  
418 sequencing (Massachusetts General Hospital DNA Core). Plasmid pET-ltaS that mediates  
419 isopropyl  $\beta$ -D-1-thiogalactopyranoside (IPTG)-inducible over-expression of *ltaS* was generated  
420 through insertion of the *ltaS* coding region immediately after the IPTG-inducible promoter  
421 region of pET-28a(+) (Novagen<sup>®</sup>). Successful insertion was confirmed with Sanger sequencing  
422 (Massachusetts General Hospital DNA Core). Confirmed construct was transformed into *E. coli*  
423 BL21 (DE3) pLys for expression analysis.

424

#### 425 *Antibiotic susceptibility testing*

426

427 Antibiotic susceptibility testing was performed according to the BioMérieux E-test protocol with  
428 slight modifications. Specifically, a single colony of either the *S. mitis* ATCC 49456 wild type or  
429 *AltaS* strain was selected from cation-adjusted Mueller-Hinton (MH) (BD Bacto) agar cultures,  
430 inoculated into 1 mL of MH broth, and incubated for 6-8 hours at 37°C with 5% CO<sub>2</sub>. Then, 2

431 mL of fresh MH broth was added to the 1 mL culture, and the incubation was resumed. After  
432 overnight incubation, the OD<sub>600nm</sub> of the cultures were measured, and samples having a value of  
433 OD<sub>600nm</sub> < 0.2 were excluded from the following experimental procedures. Cultures were spread  
434 onto prewarmed MH agar plates with sterile cotton-tipped applicators, and plates were air dried  
435 for 15-20 minutes inside a biosafety cabinet. Then, E-test strips (E-TEST® by BioMérieux)  
436 prewarmed to room temperature were applied to the plates with aseptic technique. The plates  
437 were incubated overnight at 37°C with 5% CO<sub>2</sub>. The minimum inhibition concentration (MIC)  
438 was determined by the intersection of the zone of inhibition with the E-test strip. At least three  
439 biological independent replicates were performed for each antibiotic-strain combination.

440

#### 441 *Western blot analysis*

442

443 Detection of Type I LTA via Western blot analysis was performed as previously described (39,  
444 71).

445

446 For *E. coli*, single colonies of *E. coli* containing pET-ltaS were grown overnight in LB broth  
447 with 50 µg/ml kanamycin and 5 µg/ml chloramphenicol, followed by dilution to an OD<sub>600nm</sub> of  
448 0.1 with fresh media into two replicates. After 3 hours incubation at 37°C, IPTG was added to  
449 one set of cultures to a 1 mM final concentration, followed by another 30 minutes incubation at  
450 37°C. Cell densities were normalized to an OD<sub>600nm</sub> of 0.6, and 1 mL was pelleted, washed,  
451 resuspended in 100 µl 2× Laemmli sample buffer, and boiled for 15 min. Boiled samples were  
452 stored at -20°C prior to electrophoretic analysis.

453

454 For *S. aureus*, single colonies of each *S. aureus* strain were grown overnight in TS broth with 0.5  
455 mM IPTG, 5 µg/ml erythromycin and 250 µg/ml kanamycin, and then sub-cultured to an  
456 OD<sub>600nm</sub> of 0.1 into fresh TS broth containing 5 µg/ml erythromycin, 250 µg/ml kanamycin, and  
457 either 150 ng/ml ATC or 150 ng/ml ATC with 0.5 mM IPTG. After 3 hours incubation, the  
458 OD<sub>600nm</sub> was measured, and cells equivalent to 1 ml of 1.2 OD<sub>600nm</sub> were pelleted. Cell pellets  
459 were washed and resuspended with 1 ml phosphate buffered saline (PBS), followed by 5 cycles  
460 of bead-beating at 6.5 m/s for 45 seconds, with 5 minutes on ice between cycles (FastPrep-24™  
461 MP Biomedicals). After centrifugation at 200 g for 1 min, cell lysates were collected, followed  
462 by pelleting at 17000 g for 10 minutes. The material was resuspended in 100 µl 2× Laemmli  
463 sample buffer (Bio-Rad) followed by boiling for 15 minutes in a heating block.

464

465 For streptococci and *E. faecalis*, unless indicated, OD<sub>600nm</sub> values of the overnight cultures were  
466 measured, followed by pelleting of cells equivalent to 1ml of 1.2 OD<sub>600nm</sub>. Induction of *ltaS*  
467 overexpression in *S. mitis* was conducted similarly as in *S. aureus*. Specifically, overnight  
468 cultures of *S. mitis* containing either pitetR-*ltaS* or pitetR were diluted to an OD<sub>600nm</sub> value of 0.1  
469 into fresh TH broth with 150 ng/ml ATC. After 7 hours incubation, cells equivalent to 1 ml of  
470 1.2 OD<sub>600nm</sub> were harvested. All cell pellets were washed and resuspended with 1 ml PBS, then  
471 followed with the same cell disruption and lysate preparation processes as described above for *S.*  
472 *aureus* samples.

473

474 Separation of cell lysate materials are conducted through sodium dodecyl sulfate -  
475 polyacrylamide gel electrophoresis (SDS-PAGE). Specifically, 15 µl of each boiled sample was  
476 loaded to a 15% SDS-PAGE gel, followed by electrophoresis at consistent 100 voltage and

477 subsequent PVDF membrane transfer at consistent 350 mA. The blocking solution was PBS  
478 containing 0.05% (w/v) Tween 20 and 10% (w/v) non-fat milk; antibody solutions were PBS  
479 with 0.05% (w/v) Tween 20 and 5% (w/v) non-fat milk. For *S. aureus* samples, 3 µg/ml human  
480 IgG (Sigma) was added to the blocking and antibody solutions to block the activity of protein A.  
481 Primary antibody targeting Type I LTA (clone 55, Hycult Technology) and secondary antibody  
482 (HRP-conjugated anti-mouse IgG, Cell Signaling) were used at dilutions of 1:2500 and 1:5000  
483 respectively. After adding HRP substrate (Immobilon<sup>®</sup> Western, Millipore) and shaking at room  
484 temperature for 3 minutes, chemiluminescence signals were detected with the ChemiDoc<sup>™</sup>  
485 Touch Imaging System (Bio-Rad) with default Chemiluminescent settings. Relative band  
486 intensity was analyzed with the Image Lab Software (Bio-Rad).

487

#### 488 *Lipidomics analysis*

489

490 Extraction of total lipids from stationary phase cells was performed by acidic Bligh-Dyer  
491 extraction as previously described (18). Specifically, cells were grown to stationary phase,  
492 followed by collection and storage at -80°C until lipid extraction with the acidic Bligh-Dyer  
493 methods. The dried lipid extracts were dissolved in a mixture of chloroform and methanol (2:1,  
494 v/v) before LC/MS analysis. NPLC-ESI/MS of lipids was performed as previously described  
495 (41, 72) using an Agilent 1200 Quaternary LC system (Santa Clara, CA) coupled to a high  
496 resolution TripleTOF5600 mass spectrometer (Sciex, Framingham, MA). An Ascentis<sup>®</sup> Si HPLC  
497 column (5 µm, 25 cm × 2.1 mm, Sigma-Aldrich) was used. Mobile phase A consisted of  
498 chloroform/methanol/aqueous ammonium hydroxide (800:195:5, v/v/v). Mobile phase B  
499 consisted of chloroform/methanol/water/ aqueous ammonium hydroxide (600:340:50:5,

500 v/v/v/v.). Mobile phase C consisted of chloroform/methanol/water/aqueous ammonium  
501 hydroxide (450:450:95:5, v/v/v/v). The elution program was as follows: 100% mobile phase A  
502 was held isocratically for 2 min and then linearly increased to 100% mobile phase B for 14 min  
503 and held at 100% B for 11 min. The LC gradient was then changed to 100% mobile phase C for  
504 3 min and held at 100% C for 3 min, and finally returned to 100% A over 0.5 min and held at  
505 100% A for 5 min. Instrumental settings for negative ion ESI and MS/MS analysis of lipid  
506 species were as follows: ion spray voltage (IS) = -4500 V; current gas (CUR) = 20 psi (pressure);  
507 gas-1 (GS1) = 20 psi; de-clustering potential (DP) = -55 V; and focusing potential (FP) = -150 V.  
508 The MS/MS analysis used nitrogen as the collision gas. Data acquisition and analysis were  
509 performed using the Analyst TF1.5 software (Sciex, Framingham, MA).

510

#### 511 *Serum survival test*

512

513 Overnight bacterial cultures were pelleted and washed with PBS, followed by sub-culturing into  
514 different media to an OD<sub>600nm</sub> of 0.1. Cultures were incubated at 37°C with 5% CO<sub>2</sub> for 8 hours.  
515 At t=0 and t=8 hours of incubation, viable bacterial cells were determined by serial dilution and  
516 plating on TH agar plate.

517

#### 518 **Acknowledgements:**

519 We gratefully acknowledge Dr. Angelika Gründig for providing the *S. aureus* strain ANG113  
520 and ANG499.

521



522 This work was supported by grant R21AI130666 from the National Institutes of Health and the  
523 Cecil H. and Ida Green Chair in Systems Biology Science to K.P, grant R56AI139105 and  
524 R01AI148366 from the National Institutes of Health to K.P and Z.G., and U54GM069338 to  
525 Z.G.  
526

527 **References**

528

- 529 1. Herrero ER, Slomka V, Bernaerts K, Boon N, Hernandez-Sanabria E, Passoni BB,  
530 Quirynen M, Teughels W. 2016. Antimicrobial effects of commensal oral species are  
531 regulated by environmental factors. *J Dent* 47:23–33.  
532 <http://doi.org/10.1016/j.jdent.2016.02.007>.
- 533 2. Herrero ER, Slomka V, Boon N, Bernaerts K, Hernandez-Sanabria E, Quirynen M,  
534 Teughels W. 2016. Dysbiosis by neutralizing commensal mediated inhibition of  
535 pathobionts. *Sci Rep* 6:38179. <https://doi.org/10.1038/srep38179>.
- 536 3. Thurnheer T, Belibasakis GN. 2018. *Streptococcus oralis* maintains homeostasis in oral  
537 biofilms by antagonizing the cariogenic pathogen *Streptococcus mutans*. *Mol Oral*  
538 *Microbiol* 33:234–239. <https://doi.org/10.1111/omi.12216>.
- 539 4. Wang B-Y, Kuramitsu HK. 2005. Interactions between oral bacteria: inhibition of  
540 *Streptococcus mutans* bacteriocin production by *Streptococcus gordonii*. *Appl Environ*  
541 *Microbiol* 71:354–362. <http://doi.org/10.1128/AEM.71.1.354-362.2005>.
- 542 5. Burne RA, Marquis RE. 2000. Alkali production by oral bacteria and protection against  
543 dental caries. *FEMS Microbiol Lett* 193:1–6. [https://doi.org/10.1111/j.1574-](https://doi.org/10.1111/j.1574-6968.2000.tb09393.x)  
544 [6968.2000.tb09393.x](https://doi.org/10.1111/j.1574-6968.2000.tb09393.x).
- 545 6. Kim SL, Gordon SM, Shrestha NK. 2018. Distribution of streptococcal groups causing  
546 infective endocarditis: a descriptive study. *Diagn Microbiol Infect Dis* 91:269–272.  
547 <https://doi.org/10.1016/j.diagmicrobio.2018.02.015>.
- 548 7. Slipczuk L, Codolosa JN, Davila CD, Romero-Corral A, Yun J, Pressman GS, Figueredo  
549 VM. 2013. Infective endocarditis epidemiology over five decades: a systematic review.

- 550 PLoS One 8:e82665. <https://doi.org/10.1371/journal.pone.0082665>.
- 551 8. Vincent LL, Otto CM. 2018. Infective endocarditis: update on epidemiology, outcomes,  
552 and management. *Curr Cardiol Rep* 20:86. <https://doi.org/10.1007/s11886-018-1043-2>.
- 553 9. Kilian M, Riley DR, Jensen A, Brüggemann H, Tettelin H. 2014. Parallel evolution of  
554 *Streptococcus pneumoniae* and *Streptococcus mitis* to pathogenic and mutualistic  
555 lifestyles. *MBio* 5:e01490-14. <https://doi.org/10.1128/mBio.01490-14>.
- 556 10. Kilian M, Poulsen K, Blomqvist T, Håvarstein LS, Bek-Thomsen M, Tettelin H, Sørensen  
557 UBS. 2008. Evolution of *Streptococcus pneumoniae* and its close commensal relatives.  
558 PLoS One 3:e2683. <https://doi.org/10.1371/journal.pone.0002683>.
- 559 11. Weiser JN, Ferreira DM, Paton JC. 2018. *Streptococcus pneumoniae*: transmission,  
560 colonization and invasion. *Nat Rev Microbiol* 16:355–367. [http://doi.org/10.1038/s41579-](http://doi.org/10.1038/s41579-018-0001-8)  
561 018-0001-8.
- 562 12. O’Brien KL, Wolfson LJ, Watt JP, Henkle E, Deloria-Knoll M, McCall N, Lee E,  
563 Mulholland K, Levine OS, Cherian T, Hib and Pneumococcal Global Burden of Disease  
564 Study Team. 2009. Burden of disease caused by *Streptococcus pneumoniae* in children  
565 younger than 5 years: global estimates. *Lancet* 374:893–902.  
566 [http://doi.org/10.1016/S0140-6736\(09\)61204-6](http://doi.org/10.1016/S0140-6736(09)61204-6).
- 567 13. Kawamura Y, Hou XG, Sultana F, Miura H, Ezaki T. 1995. Determination of 16S rRNA  
568 sequences of *Streptococcus mitis* and *Streptococcus gordonii* and phylogenetic  
569 relationships among members of the genus *Streptococcus*. *Int J Syst Bacteriol* 45:406–  
570 408. <https://doi.org/10.1099/00207713-45-2-406>.
- 571 14. Dowson CG, Coffey TJ, Kell C, Whiley RA. 1993. Evolution of penicillin resistance in  
572 *Streptococcus pneumoniae*; the role of *Streptococcus mitis* in the formation of a low

- 573 affinity PBP2B in *S. pneumoniae*. Mol Microbiol 9:635–643.
- 574 <https://doi.org/10.1111/j.1365-2958.1993.tb01723.x>.
- 575 15. Pimenta F, Gertz RE, Park SH, Kim E, Moura I, Milucky J, Rouphael N, Farley MM,  
576 Harrison LH, Bennett NM, Bigogo G, Feikin DR, Breiman R, Lessa FC, Whitney CG,  
577 Rajam G, Schiffer J, Da Gloria Carvalho M, Beall B. 2019. *Streptococcus infantis*,  
578 *Streptococcus mitis*, and *Streptococcus oralis* strains with highly similar *cps5* loci and  
579 antigenic relatedness to serotype 5 pneumococci. Front Microbiol 9:3199.  
580 <https://doi.org/10.3389/fmicb.2018.03199>.
- 581 16. Shekhar S, Khan R, Schenck K, Petersen FC. 2019. Intranasal immunization with the  
582 commensal *Streptococcus mitis* confers protective immunity against pneumococcal lung  
583 infection. Appl Environ Microbiol 85:e02235-18. <https://doi.org/10.1128/AEM.02235-18>.
- 584 17. Law SH, Chan ML, Marathe GK, Parveen F, Chen CH, Ke LY. 2019. An updated review  
585 of lysophosphatidylcholine metabolism in human diseases. Int J Mol Sci 20:1149.  
586 <https://doi.org/10.3390/ijms20051149>.
- 587 18. Joyce LR, Guan Z, Palmer KL. 2019. Phosphatidylcholine biosynthesis in mitis group  
588 streptococci via host metabolite scavenging. J Bacteriol 201:e00495-19.  
589 <http://doi.org/10.1101/664672>.
- 590 19. Baddiley J. 1972. Teichoic acids in cell walls and membranes of bacteria. Essays Biochem  
591 8:35–77.
- 592 20. Ryu YH, Baik JE, Yang JS, Kang SS, Im J, Yun CH, Kim DW, Lee K, Chung DK, Ju HR,  
593 Han SH. 2009. Differential immunostimulatory effects of Gram-positive bacteria due to  
594 their lipoteichoic acids. Int Immunopharmacol 9:127–133.  
595 <https://doi.org/10.1016/j.intimp.2008.10.014>.

- 596 21. Jeong JH, Jang S, Jung BJ, Jang KS, Kim BG, Chung DK, Kim H. 2015. Differential  
597 immune-stimulatory effects of LTAs from different lactic acid bacteria via MAPK  
598 signaling pathway in RAW 264.7 cells. *Immunobiology* 220:460–466.  
599 <http://doi.org/10.1016/j.imbio.2014.11.002>.
- 600 22. Han SH, Kim JH, Martin M, Michalek SM, Nahm MH. 2003. Pneumococcal lipoteichoic  
601 acid (LTA) is not as potent as staphylococcal LTA in stimulating Toll-like receptor 2.  
602 *Infect Immun* 71:5541–5548. <https://doi.org/10.1128/IAI.71.10.5541-5548.2003>.
- 603 23. Percy MG, Gründling A. 2014. Lipoteichoic acid synthesis and function in Gram-positive  
604 bacteria. *Annu Rev Microbiol* 68:81–100. [https://doi.org/10.1146/annurev-micro-091213-  
605 112949](https://doi.org/10.1146/annurev-micro-091213-112949).
- 606 24. Goebel WF, Shedlovsky T, Lavin GI, Adams MH. 1943. The heterophile antigen of  
607 pneumococcus. *J Biol Chem* 148:1–15. <https://www.jbc.org/content/148/1/1.citation>.
- 608 25. Gisch N, Kohler T, Ulmer AJ, Muñhing J, Pribyl T, Fischer K, Lindner B,  
609 Hammerschmidt S, Zähringer U. 2013. Structural reevaluation of *Streptococcus*  
610 *pneumoniae* lipoteichoic acid and new insights into its immunostimulatory potency. *J Biol*  
611 *Chem* 288:15654–15667. <https://doi.org/10.1074/jbc.M112.446963>.
- 612 26. Denapaite D, Brückner R, Hakenbeck R, Vollmer W. 2012. Biosynthesis of teichoic acids  
613 in *Streptococcus pneumoniae* and closely related species: lessons from genomes. *Microb*  
614 *Drug Resist* 18:344–358. <https://doi.org/10.1089/mdr.2012.0026>.
- 615 27. Kilian M, Tettelin H. 2019. Identification of virulence-associated properties by  
616 comparative genome analysis of *Streptococcus pneumoniae*, *S. pseudopneumoniae*, *S.*  
617 *mitis*, three *S. oralis* subspecies, and *S. infantis*. *MBio* 10:e01985-19.  
618 <https://doi.org/10.1128/mBio.01985-19>.

- 619 28. Gisch N, Schwudke D, Thomsen S, Heß N, Hakenbeck R, Denapaité D. 2015.  
620 Lipoteichoic acid of *Streptococcus oralis* Uo5: A novel biochemical structure comprising  
621 an unusual phosphorylcholine substitution pattern compared to *Streptococcus*  
622 *pneumoniae*. Sci Rep 5:16718. <https://doi.org/10.1038/srep16718>.
- 623 29. Bergström N, Jansson PE, Kilian M, Skov Sørensen UB. 2000. Structures of two cell  
624 wall-associated polysaccharides of a *Streptococcus mitis* biovar 1 strain: A unique teichoic  
625 acid-like polysaccharide and the group O antigen which is a C-polysaccharide in common  
626 with pneumococci. Eur J Biochem 267:7147–7157. <https://doi.org/10.1046/j.1432-1327.2000.01821.x-i2>.
- 628 30. Bergström N, Jansson PE, Kilian M, Skov Sørensen UB. 2003. A unique variant of  
629 streptococcal group O-antigen (C-polysaccharide) that lacks phosphocholine. Eur J  
630 Biochem 270:2157–2162. <http://doi.org/10.1046/j.1432-1033.2003.03569.x>.
- 631 31. Rosan B. 1978. Absence of glycerol teichoic acids in certain oral streptococci. Science  
632 201:918–920. <https://doi.org/10.1126/science.684416>.
- 633 32. Hamada S, Mizuno J, Kotani S, Torii M. 1980. Distribution of lipoteichoic acids and other  
634 amphipathic antigens in oral streptococci. FEMS Microbiol Lett 8:93–96.  
635 <https://doi.org/10.1111/j.1574-6968.1980.tb05057.x>.
- 636 33. Ohkuni H, Todome Y, Mizuse M, Ohtani N, Suzuki H, Igarashi H, Hashimoto Y, Ezaki T,  
637 Harada K, Imada Y, Ohkawa S, Kotani S. 1993. Biologically active extracellular products  
638 of oral viridans streptococci and the aetiology of Kawasaki disease. J Med Microbiol  
639 39:352–362. <https://doi.org/10.1099/00222615-39-5-352>.
- 640 34. Hogg SD, Whiley RA, De Soet JJ. 1997. Occurrence of lipoteichoic acid in oral  
641 streptococci. Int J Syst Bacteriol 47:62–66. <https://doi.org/10.1099/00207713-47-1-62>.

- 642 35. Campeotto I, Percy MG, MacDonald JT, Förster A, Freemont PS, Gründling A. 2014.  
643 Structural and mechanistic insight into the *Listeria monocytogenes* two-enzyme  
644 lipoteichoic acid synthesis system. *J Biol Chem* 289:28054–28069.  
645 <https://doi.org/10.1074/jbc.M114.590570>.
- 646 36. Gründling A, Schneewind O. 2007. Synthesis of glycerol phosphate lipoteichoic acid in  
647 *Staphylococcus aureus*. *Proc Natl Acad Sci* 104:8478–8483.  
648 <http://doi.org/10.1073/pnas.0701821104>.
- 649 37. Karatsa-Dodgson M, Wörmann ME, Gründling A. 2010. *In vitro* analysis of the  
650 *Staphylococcus aureus* lipoteichoic acid synthase enzyme using fluorescently labeled  
651 lipids. *J Bacteriol* 192:5341–5349. <https://doi.org/10.1128/JB.00453-10>.
- 652 38. Reichmann NT, Gründling A. 2011. Location, synthesis and function of glycolipids and  
653 polyglycerolphosphate lipoteichoic acid in Gram-positive bacteria of the phylum  
654 *Firmicutes*. *FEMS Microbiol Lett* 319:97–105. [https://doi.org/10.1111/j.1574-](https://doi.org/10.1111/j.1574-6968.2011.02260.x)  
655 [6968.2011.02260.x](https://doi.org/10.1111/j.1574-6968.2011.02260.x).
- 656 39. Gründling A, Schneewind O. 2007. Genes required for glycolipid synthesis and  
657 lipoteichoic acid anchoring in *Staphylococcus aureus*. *J Bacteriol* 189:2521–2530.  
658 <https://doi.org/10.1128/JB.01683-06>.
- 659 40. Webb AJ, Karatsa-Dodgson M, Gründling A. 2009. Two-enzyme systems for glycolipid  
660 and polyglycerolphosphate lipoteichoic acid synthesis in *Listeria monocytogenes*. *Mol*  
661 *Microbiol* 74:299–314.
- 662 41. Adams HM, Joyce LR, Guan Z, Akins RL, Palmer KL. 2017. *Streptococcus mitis* and *S.*  
663 *oralis* lack a requirement for CdsA, the enzyme required for synthesis of major membrane  
664 phospholipids in bacteria. *Antimicrob Agents Chemother* 61:e02552-16.

- 665 <https://doi.org/10.1128/AAC.02552-16>.
- 666 42. Akins RL, Katz BD, Monahan C, Alexander D. 2015. Characterization of high-level  
667 daptomycin resistance in viridans group streptococci developed upon in vitro exposure to  
668 daptomycin. *Antimicrob Agents Chemother* 59:2102–2112.  
669 <http://doi.org/10.1128/AAC.04219-14>.
- 670 43. Brundish DE, Shaw N, Baddiley J. 1965. The glycolipids from the non-capsulated strain  
671 of *Pneumococcus* I-192R, A.T.C.C. 12213. *Biochem J* 97:158–165.  
672 <https://doi.org/10.1042/bj0970158>.
- 673 44. Mollerach M, López R, García E. 1998. Characterization of the *galU* gene of  
674 *Streptococcus pneumoniae* encoding a uridine diphosphoglucose pyrophosphorylase: A  
675 gene essential for capsular polysaccharide biosynthesis. *J Exp Med* 188:2047–2056.  
676 <http://doi.org/10.1084/jem.188.11.2047>.
- 677 45. Holden HM, Rayment I, Thoden JB. 2003. Structure and function of enzymes of the  
678 Leloir pathway for galactose metabolism. *J Biol Chem* 278:43885–43888.  
679 <http://doi.org/10.1074/jbc.R300025200>.
- 680 46. Ayoola MB, Shack LA, Nakamya MF, Thornton JA, Swiatlo E, Nanduri B. 2019.  
681 Polyamine synthesis effects capsule expression by reduction of precursors in  
682 *Streptococcus pneumoniae*. *Front Microbiol* 10:1996.  
683 <https://doi.org/10.3389/fmicb.2019.01996>.
- 684 47. Berg S, Edman M, Li L, Wikström M, Wieslander Å. 2001. Sequence properties of the  
685 1,2-diacylglycerol 3-glucosyltransferase from *Acholeplasma laidlawii* membranes.  
686 Recognition of a large group of lipid glycosyltransferases in eubacteria and archaea. *J Biol*  
687 *Chem* 276:22056–22063. <http://doi.org/10.1074/jbc.M102576200>.



- 688 48. Edman M, Berg S, Storm P, Wikström M, Vikström S, Öhman A, Wieslander Å. 2003.  
689 Structural features of glycosyltransferases synthesizing major bilayer and nonbilayer-  
690 prone membrane lipids in *Acholeplasma laidlawii* and *Streptococcus pneumoniae*. *J Biol*  
691 *Chem* 278:8420–8428. <https://doi.org/10.1074/jbc.M211492200>.
- 692 49. Lanie JA, Ng WL, Kazmierczak KM, Andrzejewski TM, Davidsen TM, Wayne KJ,  
693 Tettelin H, Glass JI, Winkler ME. 2007. Genome sequence of Avery’s virulent serotype 2  
694 strain D39 of *Streptococcus pneumoniae* and comparison with that of unencapsulated  
695 laboratory strain R6. *J Bacteriol* 189:38–51. <http://doi.org/10.1128/JB.01148-06>.
- 696 50. Edgar RJ, van Hensbergen VP, Ruda A, Turner AG, Deng P, Le Breton Y, El-Sayed NM,  
697 Belew AT, McIver KS, McEwan AG, Morris AJ, Lambeau G, Walker MJ, Rush JS,  
698 Korotkov K V., Widmalm G, van Sorge NM, Korotkova N. 2019. Discovery of glycerol  
699 phosphate modification on streptococcal rhamnose polysaccharides. *Nat Chem Biol*  
700 15:463–471. <https://doi.org/10.1038/s41589-019-0251-4>.
- 701 51. Fischer W, Koch HU, Rösel P, Fiedler F, Schmuck L. 1980. Structural requirements of  
702 lipoteichoic acid carrier for recognition by the poly (ribitol phosphate) polymerase from  
703 *Staphylococcus aureus* H. A study of various lipoteichoic acids, derivatives, and related  
704 compounds. *J Biol Chem* 255:4550–4556. <https://www.jbc.org/content/255/10/4550.long>.
- 705 52. Henneke P, Morath S, Uematsu S, Weichert S, Pfitzenmaier M, Takeuchi O, Müller A,  
706 Poyart C, Akira S, Berner R, Teti G, Geyer A, Hartung T, Trieu-Cuot P, Kasper DL,  
707 Golenbock DT. 2005. Role of lipoteichoic acid in the phagocyte response to Group B  
708 *Streptococcus*. *J Immunol* 174:6449–6455. <https://doi.org/10.4049/jimmunol.174.10.6449>.
- 709 53. Theilacker C, Kaczynski Z, Kropec A, Fabretti F, Sange T, Holst O, Huebner J. 2006.  
710 Opsonic antibodies to *Enterococcus faecalis* strain 12030 are directed against lipoteichoic

- 711 acid. Infect Immun 74:5703–5712. <http://doi.org/10.1128/IAI.00570-06>.
- 712 54. Huebner J, Quaas A, Krueger WA, Goldmann DA, Pier GB. 2000. Prophylactic and  
713 therapeutic efficacy of antibodies to a capsular polysaccharide shared among vancomycin-  
714 sensitive and -resistant Enterococci. Infect Immun 68:4631–4636.  
715 <http://doi.org/10.1128/IAI.68.8.4631-4636.2000>.
- 716 55. Baik JE. 2015. Ph.D. thesis. Molecular structure and immunological function of  
717 lipoteichoic acid purified from *Enterococcus faecalis*. Seoul National University.
- 718 56. Oku Y, Kurokawa K, Matsuo M, Yamada S, Lee B-L, Sekimizu K. 2009. Pleiotropic roles  
719 of polyglycerolphosphate synthase of lipoteichoic acid in growth of *Staphylococcus*  
720 *aureus* cells. J Bacteriol 91:141–151. <http://doi.org/10.1128/JB.01221-08>.
- 721 57. Lamster IB. 1997. Evaluation of components of gingival crevicular fluid as diagnostic  
722 tests. Ann Periodontol 2:123–137. <https://doi.org/10.1902/annals.1997.2.1.123>.
- 723 58. Schirner K, Marles-Wright J, Lewis RJ, Errington J. 2009. Distinct and essential  
724 morphogenic functions for wall- and lipo-teichoic acids in *Bacillus subtilis*. EMBO J  
725 28:830–842. <http://doi.org/10.1038/emboj.2009.25>.
- 726 59. Garufi G, Hendrickx AP, Beerli K, Kern JW, Sharma A, Richter SG, Schneewind O,  
727 Missiakas D. 2012. Synthesis of lipoteichoic acids in *Bacillus anthracis*. J Bacteriol  
728 194:4312–4321. <https://doi.org/10.1128/JB.00626-12>.
- 729 60. Richter SG, Elli D, Kim HK, Hendrickx APA, Sorg JA, Schneewind O, Missiakas D.  
730 2013. Small molecule inhibitor of lipoteichoic acid synthesis is an antibiotic for Gram-  
731 positive bacteria. Proc Natl Acad Sci 110:3531–3536.  
732 <https://doi.org/10.1073/pnas.1217337110>.
- 733 61. Paganelli FL, van de Kamer T, Brouwer EC, Leavis HL, Woodford N, Bonten MJM,

- 734 Willems RJL, Hendrickx APA. 2017. Lipoteichoic acid synthesis inhibition in  
735 combination with antibiotics abrogates growth of multidrug-resistant *Enterococcus*  
736 *faecium*. *Int J Antimicrob Agents* 49:355–363.  
737 <https://doi.org/10.1016/j.ijantimicag.2016.12.002>.
- 738 62. Gisch N, Auger JP, Thomsen S, Roy D, Xu J, Schwudke D, Gottschalk M. 2018.  
739 Structural analysis and immunostimulatory potency of lipoteichoic acids isolated from  
740 three *Streptococcus suis* serotype 2 strains. *J Biol Chem* 293:12011–12025.  
741 <http://doi.org/10.1074/jbc.RA118.002174>.
- 742 63. Van De Rijn I, Kessler RE. 1980. Growth characteristics of group A streptococci in a new  
743 chemically defined medium. *Infect Immun* 27:444–448.  
744 <https://doi.org/10.1128/IAI.27.2.444-448.1980>.
- 745 64. Altschul SF, Madden TL, Schäffer AA, Zhang J, Zhang Z, Miller W, Lipman DJ. 1997.  
746 Gapped BLAST and PSI-BLAST: a new generation of protein database search programs.  
747 *Nucleic Acids Res* 25:3389–3402. <https://doi.org/10.1093/nar/25.17.3389>.
- 748 65. El-Gebali S, Mistry J, Bateman A, Eddy SR, Luciani A, Potter SC, Qureshi M,  
749 Richardson LJ, Salazar GA, Smart A, Sonnhammer ELL, Hirsh L, Paladin L, Piovesan D,  
750 Tosatto SCE, Finn RD. 2019. The Pfam protein families database in 2019. *Nucleic Acids*  
751 *Res* 47:D427–D432. <https://doi.org/10.1093/nar/gky995>.
- 752 66. Morrison DA, Khan R, Junges R, Åmdal HA, Petersen FC. 2015. Genome editing by  
753 natural genetic transformation in *Streptococcus mutans*. *J Microbiol Methods* 119:134–  
754 141. <https://doi.org/10.1016/j.mimet.2015.09.023>.
- 755 67. Salvadori G, Junges R, Morrison DA, Petersen FC. 2016. Overcoming the barrier of low  
756 efficiency during genetic transformation of *Streptococcus mitis*. *Front Microbiol* 7:1009.

- 757 <https://doi.org/10.3389/fmicb.2016.01009>.
- 758 68. Bryan EM, Bae T, Kleerebezem M, Dunny GM. 2000. Improved vectors for nisin-  
759 controlled expression in Gram-positive bacteria. *Plasmid* 44:183–190.  
760 <https://doi.org/10.1006/plas.2000.1484>.
- 761 69. Granok AB, Parsonage D, Ross RP, Caparon MG. 2000. The RofA binding site in  
762 *Streptococcus pyogenes* is utilized in multiple transcriptional pathways. *J Bacteriol*  
763 182:1529–1540. <http://doi.org/10.1128/JB.182.6.1529-1540.2000>.
- 764 70. Geissendiirfer M, Gang Hillen W. 1990. Regulated expression of heterologous genes in  
765 *Bacillus subtilis* using the Tn10 encoded *tet* regulatory elements. *Appl Environ Microbiol*  
766 33:657–663. <https://doi.org/10.1007/BF00604933>.
- 767 71. Wei Y, Kouse AB, Murphy ER. 2017. Transcriptional and posttranscriptional regulation  
768 of *Shigella shuT* in response to host-associated iron availability and temperature.  
769 *Microbiologyopen* 6:e442. <https://doi.org/10.1002/mbo3.442>.
- 770 72. Tan BK, Bogdanov M, Zhao J, Dowhan W, Raetz CRH, Guan Z. 2012. Discovery of a  
771 cardiolipin synthase utilizing phosphatidylethanolamine and phosphatidylglycerol as  
772 substrates. *Proc Natl Acad Sci U S A* 109:16504–16509.  
773 <https://doi.org/10.1073/pnas.1212797109>.
- 774 73. Taylor RG, Walker DC, McInnes RR. 1993. *E.coli* host strains significantly affect the  
775 quality of small scale plasmid DNA preparations used for sequencing. *Nucleic Acids Res*  
776 21:1677–1678. <https://doi.org/10.1093/nar/21.7.1677>.
- 777 74. Slager J, Aprianto R, Veening JW. 2018. Deep genome annotation of the opportunistic  
778 human pathogen *Streptococcus pneumoniae* D39. *Nucleic Acids Res* 46:9971–9989.  
779 <https://doi.org/10.1093/nar/gky725>.

- 780 75. Tettelin H, Nelson KE, Paulsen IT, Eisen JA, Read TD, Peterson S, Heidelberg J, DeBoy  
781 RT, Haft DH, Dodson RJ, Durkin AS, Gwinn M, Kolonay JF, Nelson WC, Peterson JD,  
782 Umayam LA, White O, Salzberg SL, Lewis MR, Radune D, Holtzapple E, Khouri H,  
783 Wolf AM, Utterback TR, Hansen CL, McDonald LA, Feldblyum T V, Angiuoli S,  
784 Dickinson T, Hickey EK, Holt IE, Loftus BJ, Yang F, Smith HO, Venter JC, Dougherty  
785 BA, Morrison DA, Hollingshead SK, Fraser CM. 2001. Complete genome sequence of a  
786 virulent isolate of *Streptococcus pneumoniae*. *Science* 293:498–506.  
787 <https://doi.org/10.1126/science.1061217>.
- 788 76. Gold OG, Jordan H V., van Houte J. 1975. The prevalence of enterococci in the human  
789 mouth and their pathogenicity in animal models. *Arch Oral Biol* 20:473–477.  
790 [http://dx.doi.org/10.1016/0003-9969\(75\)90236-8](http://dx.doi.org/10.1016/0003-9969(75)90236-8).

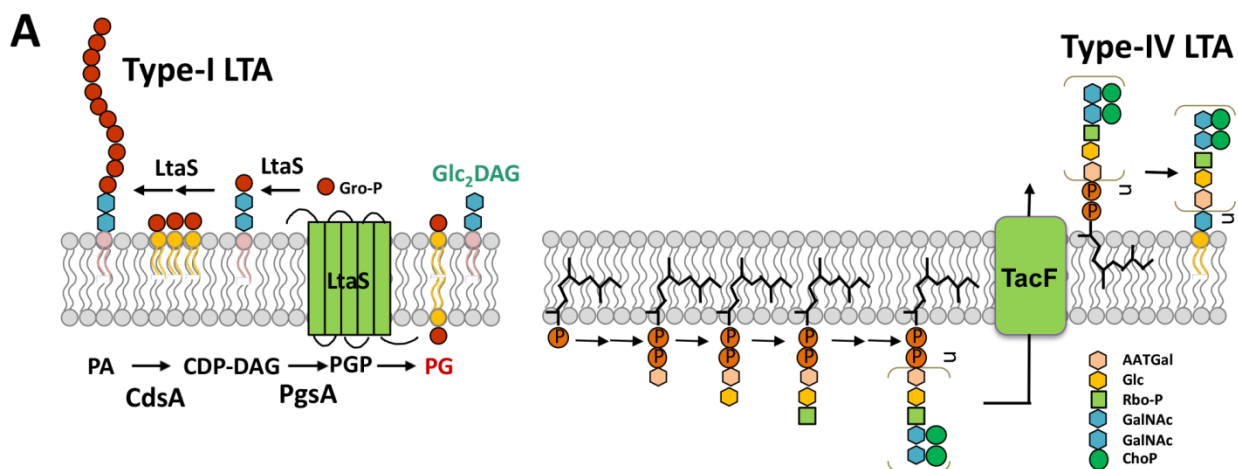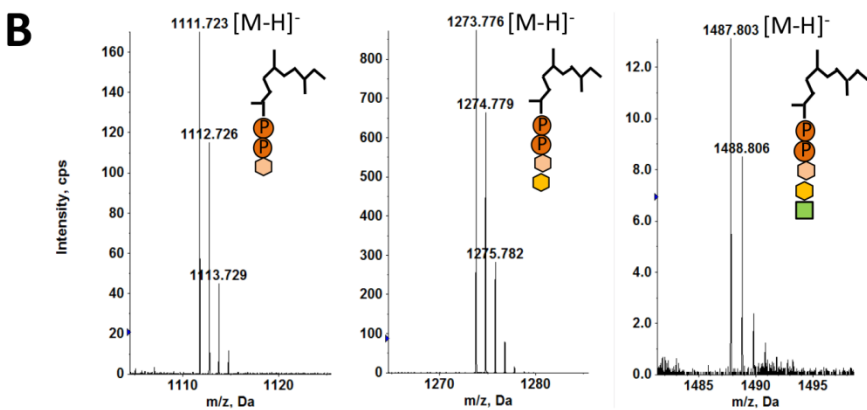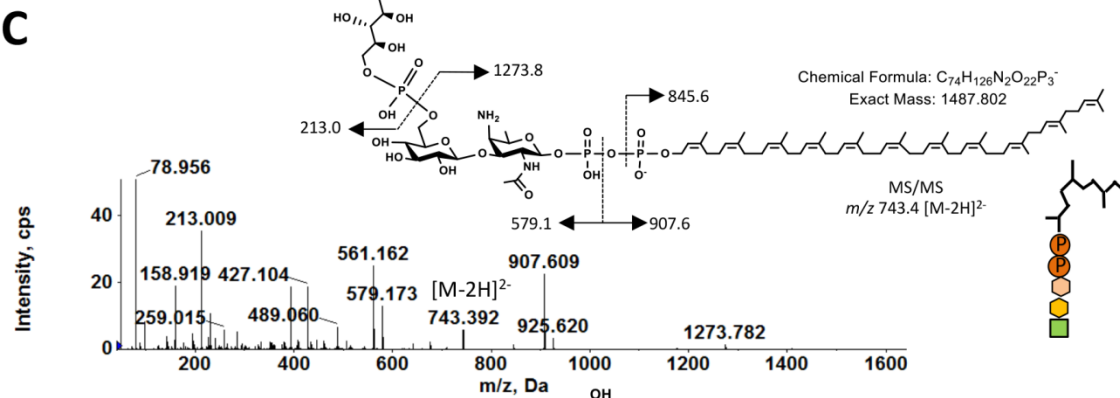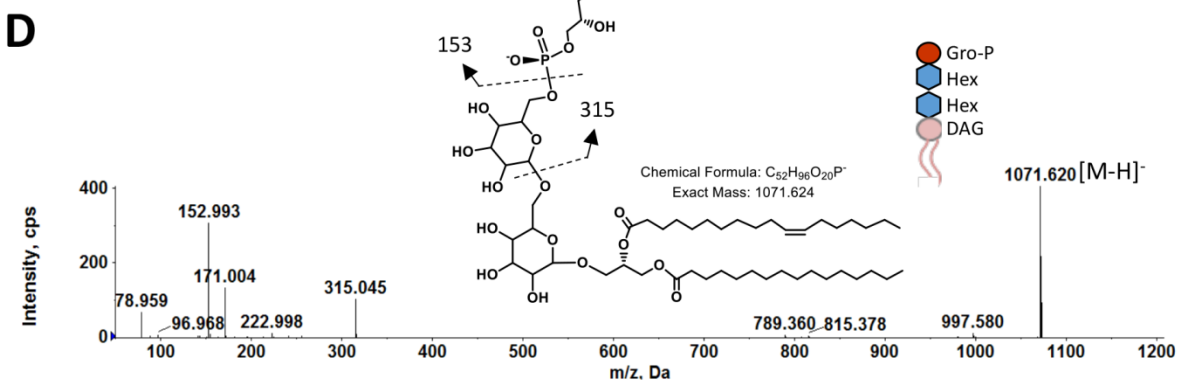

792 **Fig. 1:** Detection of Type-IV LTA biosynthetic precursors and (Gro-P)-dihexosyl-DAG from the  
793 lipid extracts of *S. mitis* ATCC 49456 (SM61). Total lipids were extracted from *S. mitis* grown to  
794 mid-log phase in Todd Hewitt broth. A) Schematic of biosynthesis of *S. aureus* Type I and *S.*  
795 *pneumoniae* Type IV LTAs. B) Negative ion ESI mass spectra showing the  $[M-H]^-$  ions of  $C_{55}$ -  
796 PP-AATGal,  $C_{55}$ -PP-AATGal-Gal, and  $C_{55}$ -PP-AATGal-Gal-(Rbo-P). These  $C_{55}$ -PP-linked  
797 saccharides are intermediates involved in assembling the pseudopentasaccharide repeating units  
798 of Type IV LTA. C) MS/MS product ion mass spectrum of the  $m/z$  743.4  $[M-2H]^{2-}$  ion of  $C_{55}$ -  
799 PP-AATGal-Gal-(Rbo-P) and the MS/MS fragmentation scheme. D) MS/MS of the  $m/z$  1071.6  
800  $[M-H]^-$  ion of (Gro-P)-dihexosyl-DAG and the proposed fragmentation scheme. Abbreviations:  
801 PA, phosphatidic acid; CDP, cytidine diphosphate; PG, phosphatidylglycerol; PGP, PG-3-  
802 phosphate; Glc, glucose;  $C_{55}$ -PP, undecaprenyl pyrophosphate; DAG, diacylglycerol; Gal,  
803 galacosyl; Gro-P, glycerophosphate; Rbo-P, ribitol-phosphate; AATGal, 2-acetamido-4-amino-  
804 2,4,6-trideoxy-D-galactose; GalNAc, N-acetyl-D-galactosamine; ChoP, phosphocholine; Hex,  
805 hexose.

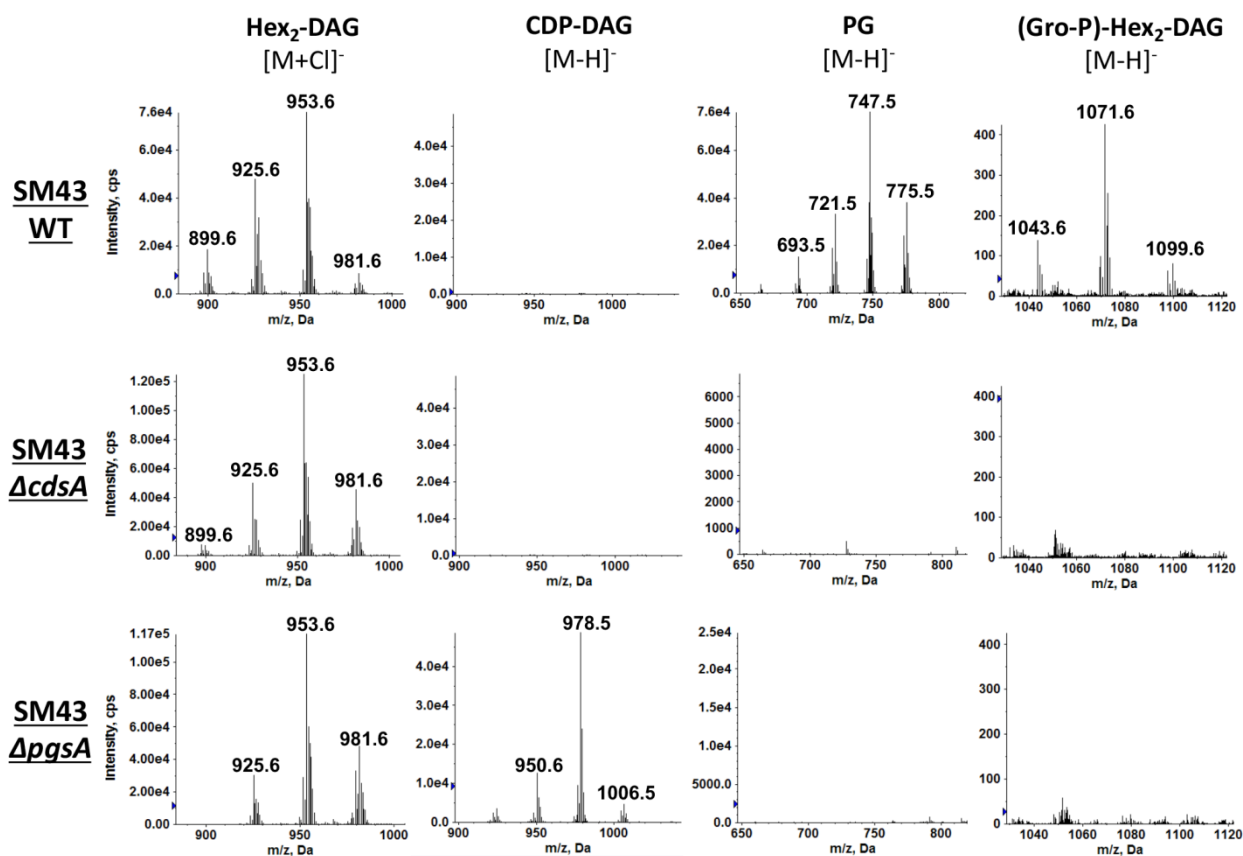

806

807 **Fig. 2:** Negative ion ESI mass spectra showing the detection of phospholipids and anchor  
808 profiles from lipid extracts of *Streptococcus* sp. 1643 (SM43) wild type (WT),  $\Delta cdsA$ , and  $\Delta pgsA$   
809 strains. Total lipids were extracted from SM43 cells grown to mid-log phase in Todd Hewitt  
810 medium. From left to right, each column correspondingly shows the mass spectra of the [M+Cl]<sup>-</sup>  
811 ions of dihexosyl-diacylglycerol (Hex<sub>2</sub>-DAG) (retention time: ~8.0-10.0 min; most abundant *m/z*  
812 953.6 for Hex<sub>2</sub>-DAG(16:0/18:1)), [M-H]<sup>-</sup> ions of cytidine diphosphate-DAG (CDP-DAG)  
813 (retention time: ~21.5-22.5 min; most abundant *m/z* 978.5 for CDP-DAG(16:0/18:1)),  
814 phosphatidylglycerol (PG) (retention time: ~12.5-13.5 min; most abundant *m/z* 747.5 for PG  
815 (16:0/18:1)), and glycerophosphate (Gro-P) linked Hex<sub>2</sub>-DAG (retention time: ~20.0-20.5 min;  
816 most abundant *m/z* 1071.6 for (Gro-P)-Hex<sub>2</sub>-DAG(16:0/18:1)). The identification of these lipid  
817 species is supported by both exact mass measurement and MS/MS.



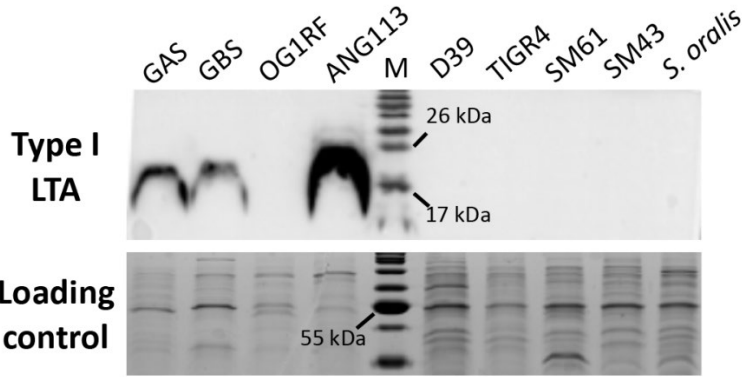

818

819 **Fig. 3:** Detection of Type I LTA. Cell lysates from over-night cultures of *Streptococcus*  
820 *pyogenes* NZ131 (GAS), *S. agalactiae* A909 (GBS), *Enterococcus faecalis* OG1RF (OG1RF),  
821 *Staphylococcus aureus* (ANG113), *S. pneumoniae* D39 (D39), *S. pneumoniae* TIGR4 (TIGR4),  
822 *S. mitis* ATCC 49456 (SM61), *Streptococcus* sp. 1643 (SM43), and *S. oralis* ATCC 35037 (*S.*  
823 *oralis*) were analyzed. Anti-Type I LTA antibody was used to detect the production of Type I  
824 LTA. Loading control was stained with Commassie blue.

825

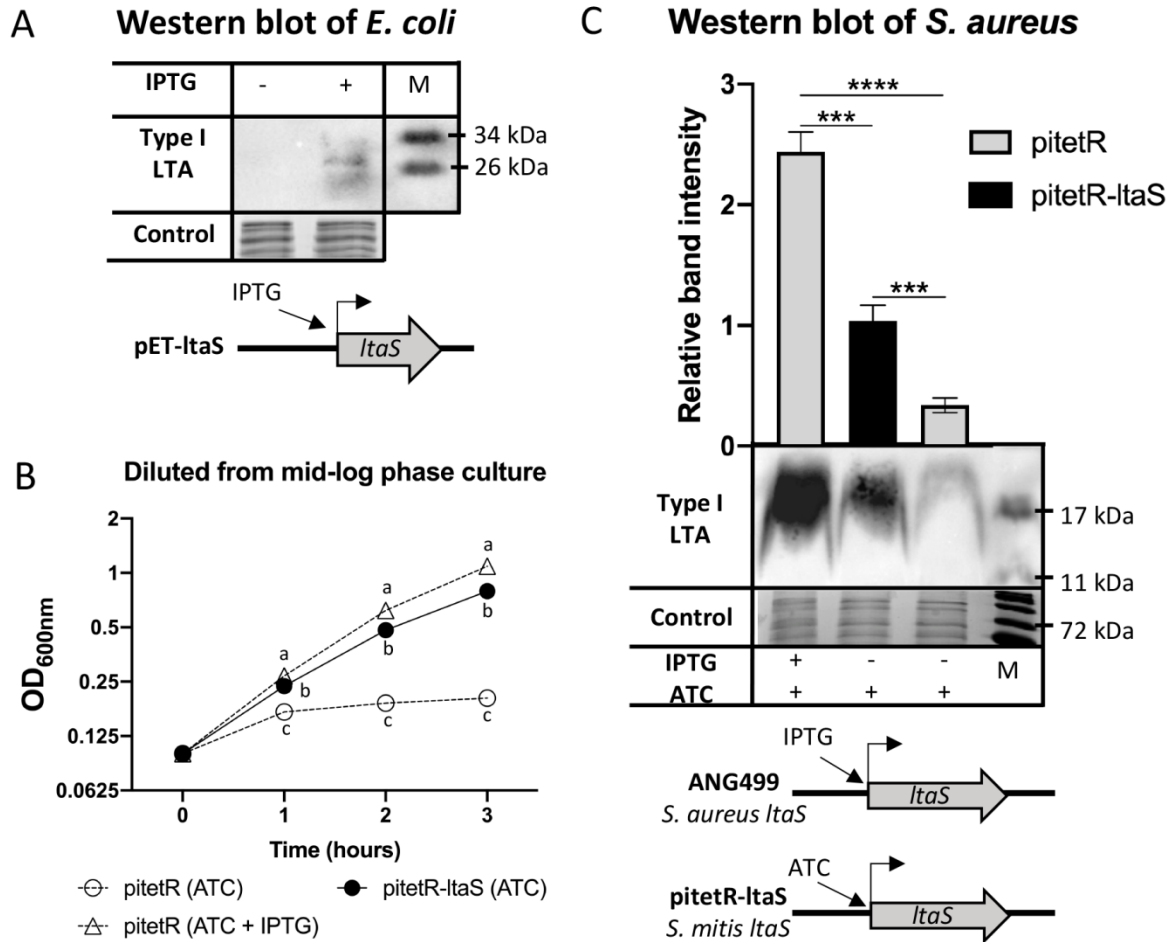

826

827 **Fig. 4:** Heterologous expression of *S. mitis ltaS* in *E. coli* and *S. aureus*. A. Western blot  
 828 detection of Gro-P polymers from *E. coli* containing plasmid pET-ltaS grown in liquid Luria-  
 829 Bertani (LB) media with the addition of isopropyl  $\beta$ -D-1-thiogalactopyranoside (IPTG) and  
 830 without IPTG. IPTG was added to mid-log phase bacterial cultures followed by another 30  
 831 minutes incubation at 37°C before cell pelleting. Three biological independent replicates were  
 832 performed for each sample. B. Growth curves of *S. aureus* ANG499 containing either pitetR or  
 833 pitetR-ltaS grown in Tryptic Soy Broth (TSB) with the addition of either 150 ng/ml  
 834 anhydrotetracycline (ATC) only or 150 ng/ml ATC and 0.5 mM IPTG as indicated. Samples  
 835 were grown in TSB with 0.5 mM IPTG over-night, followed by sub-culturing into fresh TSB  
 836 with the indicated addition of induction reagents and incubated for 3 hours. Then, another sub-

837 culturing to an OD<sub>600nm</sub> of 0.1 with fresh media same as previous incubation was performed.

838 After the second sub-culture, OD<sub>600nm</sub> values were measured every hour and plotted. C. Western

839 blot detection of Type I LTA from *S. aureus* ANG499 containing either pitetR or pitetR-ltaS.

840 Samples were grown in the same way as described in B, after the first sub-culturing and

841 incubation, cells equal to 1ml of OD<sub>600nm</sub> at 1.2 were harvested followed by lysate preparation

842 and immunodetection. Schematics of induction expression of chromosomal or plasmid carried

843 *ltaS* were shown in both A & C. Loading controls of both A & C were stained with Commassie

844 blue. Western blot band intensity in C was normalized to the loading control and the pitetR-ltaS

845 sample. For B and C, 4 biological replicates were performed; averages of the sample values were

846 plotted with the error bar stands for standard deviation. Statistical analyses were performed with

847 one-way ANOVA; significant difference was determined by  $P$ -value  $< 0.05$ . For B, at a given

848 time point, letter “a”, “b”, and “c” each represents a statistical group that is significantly different

849 from other groups;  $P$ -values of all group comparisons are  $< 10^{-6}$ . For C, “\*\*\*\*” indicates  $10^{-5} < P$ -

850 value  $< 10^{-6}$ ; “\*\*\*\*\*” indicates  $P$ -value  $< 10^{-6}$ .

851

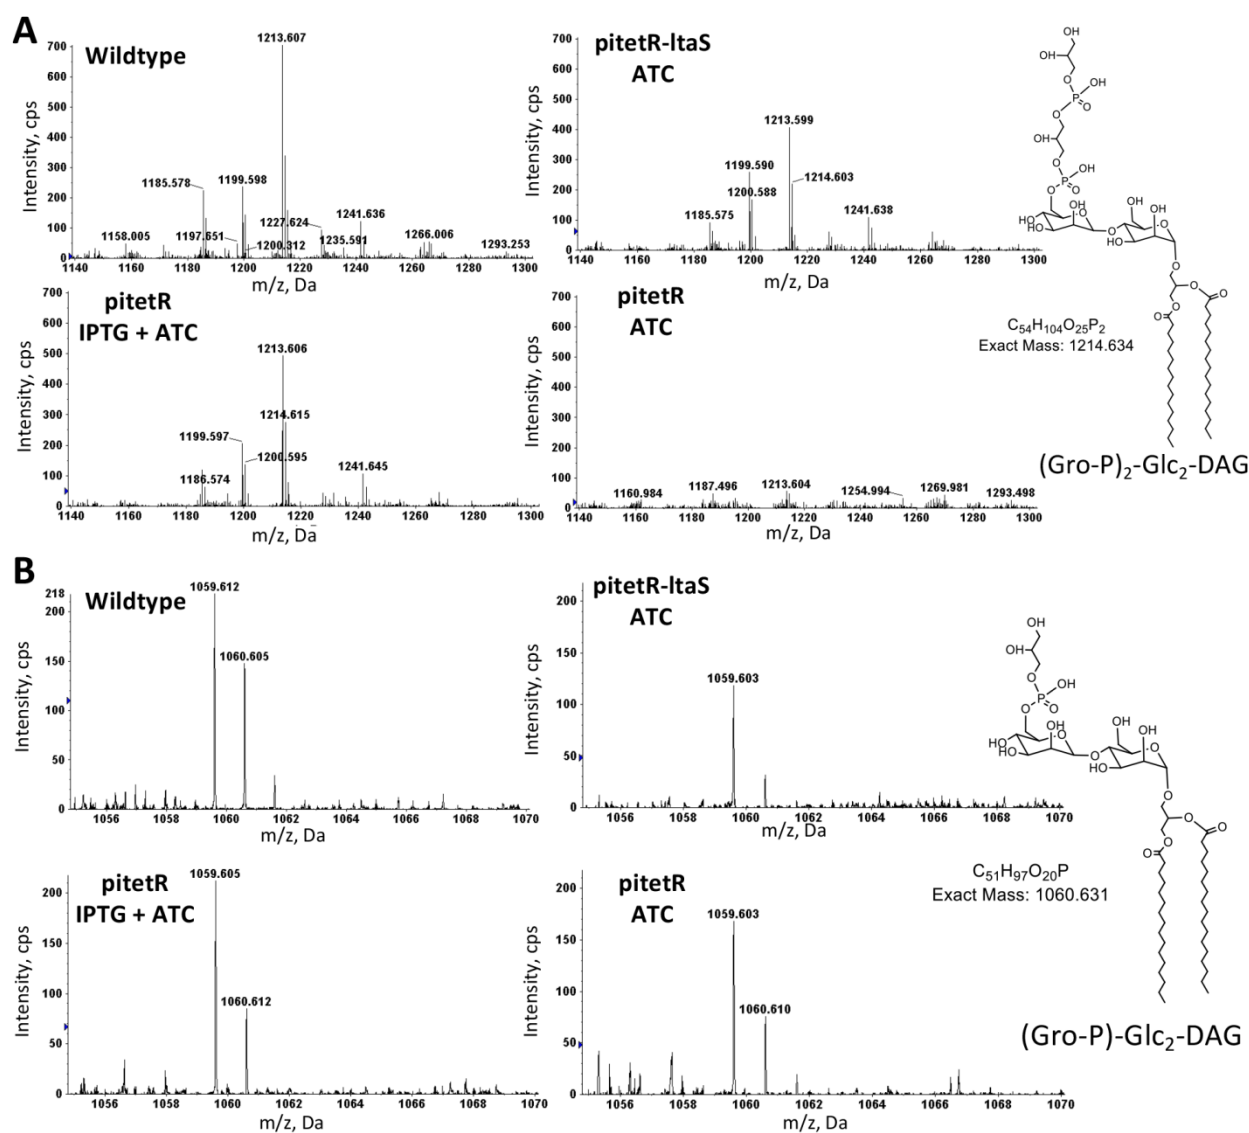

852  
 853 **Fig. 5:** MS detection of Type I LTA biosynthetic precursors that contain one or two Gro-P units  
 854 in the lipid extracts of *S. aureus*. *S. aureus* strain ANG113 (wildtype), ANG499 containing  
 855 plasmid pitetR-ltaS (pitetR-ltaS), and ANG499 containing the vector control pitetR (pitetR) were  
 856 grown in liquid Tryptic Soy medium to late exponential phase with the addition of ATC and  
 857 IPTG as indicated. Total lipids were extracted and analyzed with NPLC-ESI/MS in the negative  
 858 ion mode. Shown are the mass spectra of the deprotonated [M-H]<sup>-</sup> ions for (Gro-P)-Glc<sub>2</sub>-DAG  
 859 (retention time: ~20.0-20.5 min; most abundant m/z 1059.6) (A) and (Gro-P)<sub>2</sub>-Glc<sub>2</sub>-DAG  
 860 (retention time: ~22.5-23.0 min; most abundant m/z 1213.6) (B). Abbreviations: Gro-P,

861 glycerophosphate; Glc, glucosyl; DAG, diacylglycerol. Three biologically independent replicates  
862 were performed for each strain under each indicated culture condition.  
863

864

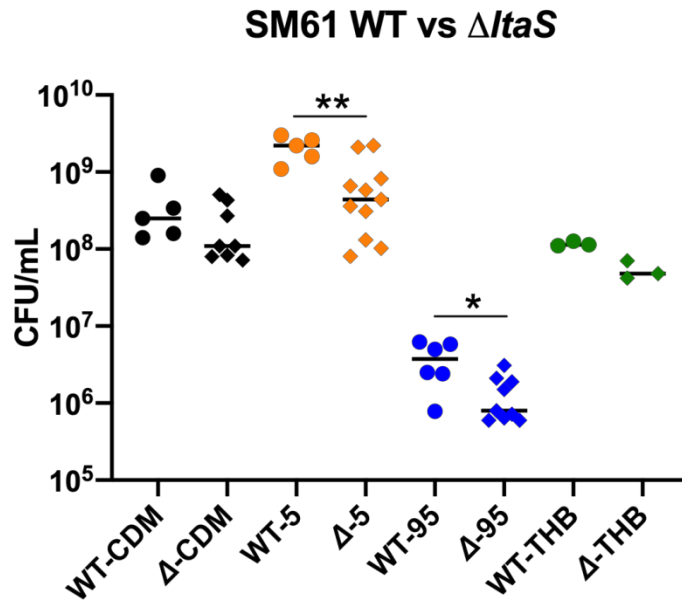

865

866 **Fig. 6:** Deletion of *ltaS* alters the responses of *S. mitis* ATCC 49456 (SM61) to human serum.

867 Wild type (WT) or *ltaS* SM61 ( $\Delta$ ) strains were cultured in chemically defined medium (CDM),

868 CDM with 5% human serum (5), 95% human serum (95) with 5% phosphate buffered saline, and

869 Todd Hewitt broth (THB). The CFU/mL of cultures after 8 hours incubation are shown. Each dot

870 represents a biological independent repeat. Statistical analysis was performed with the Mann-

871 Whitney method. Statistical significant is defined by  $P$ -value  $< 0.05$ , and indicated in the plot as

872 “\*” for  $0.01 < P$ -value  $< 0.05$ , “\*\*” for  $0.001 < P$ -value  $< 0.01$ .

873

874 **Table 1:** Detection of lipoteichoic acid intermediates from selected strains of mitis group  
 875 streptococci

| Bacterial species                    | Strain          | Presence of biosynthetic precursor |               |                    |
|--------------------------------------|-----------------|------------------------------------|---------------|--------------------|
|                                      |                 | (Gro-P)-dihexosyl-DAG              | dihexosyl-DAG | AATGal-Gal-(Rbo-P) |
| <i>S. mitis</i> ATCC 49456 (SM61)    | WT <sup>a</sup> | yes                                | yes           | yes                |
|                                      | $\Delta cdsA$   | <b>No</b>                          | yes           | yes                |
|                                      | $\Delta ltaS$   | yes                                | yes           | yes                |
| <i>Streptococcus</i> sp. 1643 (SM43) | WT              | yes                                | yes           | yes                |
|                                      | $\Delta cdsA$   | <b>No</b>                          | yes           | yes                |
|                                      | $\Delta pgsA$   | <b>No</b>                          | yes           | yes                |
| <i>S. oralis</i> ATCC 35037          | WT              | yes                                | yes           | yes                |
| <i>S. pneumoniae</i>                 | D39             | yes                                | yes           | yes                |
|                                      | TIGR4           | yes                                | yes           | yes                |

876 <sup>a</sup> WT, wildtype

877 **Table 2:** Orthologs of glycolipid biosynthetic genes

| Chemical precursor <sup>a</sup> | Biosynthetic enzyme (reference gene <sup>b</sup> )                          | <i>S. mitis</i> ATCC 49456 |                 | <i>S. oralis</i> ATCC 35037 |                 | <i>Streptococcus</i> sp. 1643 |                 | <i>S. pneumoniae</i> TIGR4 |                 |
|---------------------------------|-----------------------------------------------------------------------------|----------------------------|-----------------|-----------------------------|-----------------|-------------------------------|-----------------|----------------------------|-----------------|
|                                 |                                                                             | Locus tag                  | AA <sup>c</sup> | Locus tag                   | AA <sup>c</sup> | Locus tag                     | AA <sup>c</sup> | Locus tag                  | AA <sup>c</sup> |
| UDP-Glc                         | $\alpha$ -phosphoglucomutase ( <i>pgm</i> ) (44)                            | SM12261_RS05265            | 98.6            | HMPREF8579_1344             | 97.0            | FD735_RS05500                 | 97.2            | SP_1498                    | 100.0           |
|                                 | UTP: $\alpha$ -glucose-1-phosphate uridylyltransferase ( <i>galU</i> ) (44) | SM12261_RS05330            | 95.3            | HMPREF8579_0527             | 93.7            | FD735_RS00655                 | 93.7            | SP_2092                    | 95.7            |
| UDP-Gal                         | Galactokinase ( <i>galK</i> ) (46)                                          | SM12261_RS02220            | 97.2            | HMPREF8579_1824             | 95.7            | FD735_RS02200                 | 97.0            | SP_1853                    | 97.5            |
|                                 | Galactose-1-phosphate uridylyltransferase 2 ( <i>galT2</i> ) (46)           | SM12261_RS02225            | 94.9            | HMPREF8579_1822             | 93.1            | FD735_RS02210                 | 92.3            | SP_1852                    | 96.2            |
| Glc-DAG                         | glycosyltransferase ( <i>spr0982</i> ) (47)                                 | SM12261_RS04480            | 96.6            | HMPREF8579_1104             | 88.4            | FD735_RS04125                 | 88.6            | SP_1076                    | 99.3            |
| Gal-Glc-DAG                     | glycosyltransferase ( <i>cpoA</i> ) (48)                                    | SM12261_RS04475            | 97.4            | HMPREF8579_1103             | 87.0            | FD735_RS04120                 | 87.3            | SP_1075                    | 99.7            |

878 <sup>a</sup> Abbreviations: UDP, uridine diphosphate; Glc, glucose (glucosyl); Gal, galactose (galactosyl); DAG, diacylglycerol.879 <sup>b</sup> *S. pneumoniae* R6 gene was used as reference880 <sup>c</sup> Percentage (%) of amino acid sequence identity to the referenced enzyme



881 **Table 3:** Bacterial strains and plasmids used in this research

| Name                            | Features                                                                                                                                                                              | Reference/<br>Source |
|---------------------------------|---------------------------------------------------------------------------------------------------------------------------------------------------------------------------------------|----------------------|
| <b>Strains</b>                  |                                                                                                                                                                                       |                      |
| <i>Escherichia coli</i>         |                                                                                                                                                                                       |                      |
| DH5 $\alpha$                    | Cloning strain                                                                                                                                                                        | (73)                 |
| BL21 (DE3) pLys                 | Engineered <i>E. coli</i> strain for protein expression, contains Tn10 that produces T7 polymerase and plasmid pLys; presence of pLys is maintained with 5 $\mu$ g/ml chloramphenicol | Novagen <sup>®</sup> |
| <i>Streptococcus mitis</i>      |                                                                                                                                                                                       |                      |
| ATCC 49456 (SM61)               | Type strain of <i>S. mitis</i>                                                                                                                                                        | ATCC <sup>®</sup>    |
| SM61 $\Delta$ <i>cdsA</i>       | SM61 with coding region of <i>cdsA</i> (SM12261_RS08390) deleted                                                                                                                      | This study           |
| SM61 $\Delta$ <i>ltaS</i>       | SM61 with coding region of <i>ltaS</i> (SM12261_RS03435) replaced with gene <i>ermB</i>                                                                                               | This study           |
| <i>Streptococcus</i> sp.        |                                                                                                                                                                                       |                      |
| 1643 (SM43)                     | Mitis group streptococcus isolated from bacteremia patient                                                                                                                            | (42)                 |
| SM43 $\Delta$ <i>cdsA</i>       | SM43 with coding region of <i>cdsA</i> (FD735_RS08600) deleted                                                                                                                        | (18)                 |
| SM43 $\Delta$ <i>pgsA</i>       | SM43 with coding region of <i>pgsA</i> (FD735_RS09695) replaced with gene <i>ermB</i>                                                                                                 | (18)                 |
| <i>Streptococcus oralis</i>     |                                                                                                                                                                                       |                      |
| ATCC 35037                      | Type strain of <i>S. oralis</i>                                                                                                                                                       | ATCC <sup>®</sup>    |
| <i>Streptococcus pneumoniae</i> |                                                                                                                                                                                       |                      |
| D39                             | Clinically isolated strain, serotype 2                                                                                                                                                | (74)                 |
| TIGR4                           | Clinically isolated strain, serotype 4                                                                                                                                                | (75)                 |
| <i>Streptococcus pyogenes</i>   |                                                                                                                                                                                       |                      |
| NZ131                           | Clinically isolated strain, serotype M49                                                                                                                                              | ATCC <sup>®</sup>    |
| <i>Streptococcus agalactiae</i> |                                                                                                                                                                                       |                      |
| A909                            | Isolated from a septic human neonate, serotype Ia                                                                                                                                     | ATCC <sup>®</sup>    |
| <i>Staphylococcus aureus</i>    |                                                                                                                                                                                       |                      |
| ANG113                          | Strain RN4220, isogenic wild type control of ANG499                                                                                                                                   | (36)                 |
| ANG499                          | Generated from strain RN4220 (wild type), expression of chromosomal <i>ltaS</i> is induced with 1mM IPTG; genotype maintained with 5 $\mu$ g/ml erythromycin                          | (36)                 |

---

*Enterococcus faecalis*

OG1RF Rifampicin and fusidic acid resistant derivative of a human oral cavity isolate (76)

---

**Plasmids**

---

pABG5 Low copy shuttle plasmid. Presence of the plasmid is preserved by addition of kanamycin, with the final concentration of 50 µg/ml in *E. coli*, 250 µg/ml in *S. aureus*, and 500 µg/ml in *S. mitis* (69)

---

pitetR-ltaS Plasmid pABG5 that has *S. mitis ltaS* coding region inserted after tetracycline inducible promoter  $P_{xy/tet}$ . Induction is conducted with addition of anhydrotetracycline to a final concentration of 150 ng/ml This study

---

pitetR Plasmid pitetR-ltaS that lacks the *ltaS* coding region, working as empty plasmid control This study

---

pET-28a(+) Cloning plasmid; presence of the plasmid is selected with 50 µg/ml kanamycin Novagen®

---

pET-ltaS Plasmid pET-28a(+) that has *S. mitis ltaS* inserted after IPTG inducible promoter. Induction is conducted with addition of IPTG to a final concentration of 1mM This study

---

pMSP3535 Plasmid used as the DNA template for amplification of the *ermB* containing fragment. Presence of the plasmid in *E. coli* is maintained with 50 µg/ml erythromycin (68)

---

882

883

884

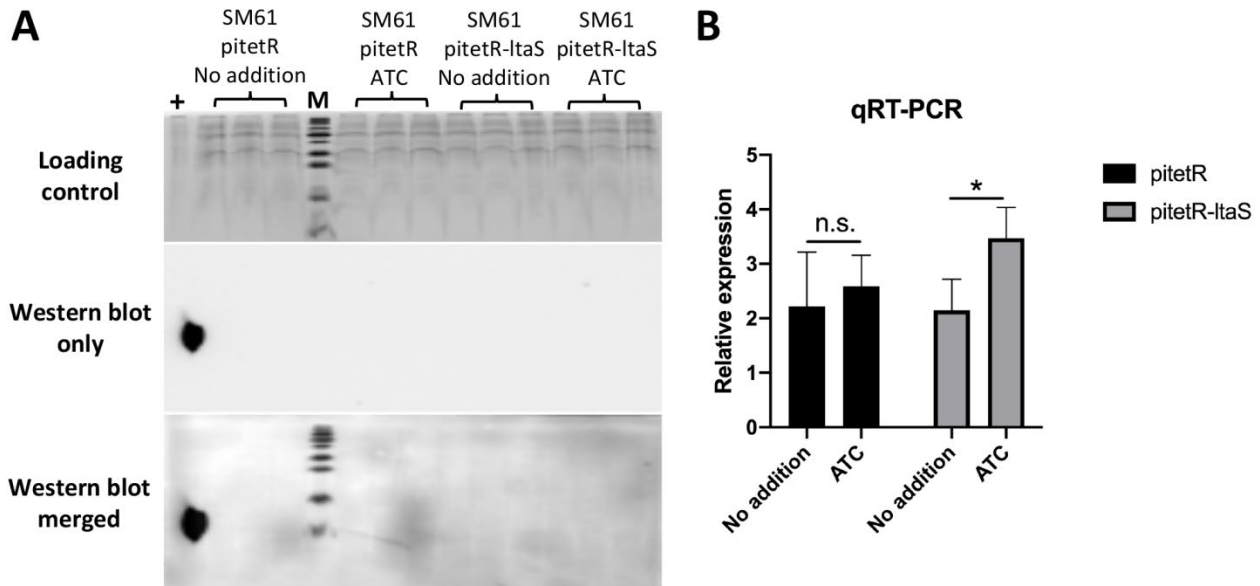

885

886 **Fig. S1:** A) Western blot detection of Type I LTA in *Streptococcus mitis* ATCC 49465 (SM61)

887 containing either the *ltaS* expression plasmid pitetR-ltaS or empty plasmid control (pitetR).

888 Over-expression of *ltaS* was induced by addition of 150 ng/ml anhydrotetracycline (ATC). Cell

889 lysates were prepared from cultures grown to stationary phase. Cell lysate of *S. aureus* was used

890 as positive control (+). Western blot figure was obtained 2 minutes after the saturation of the

891 positive control signal. Loading control was stained with Commassie blue. B) qRT-PCR

892 detection of the transcript levels of *ltaS* from SM61 containing pitetR-ltaS or pitetR with or

893 without ATC induction. Total RNA was harvested from mid-log phase cells exposed to ATC for

894 30 minutes. Relative expression levels of *ltaS* were normalized to that of 16S rRNA of the same

895 sample with the  $\Delta\Delta C_t$  method. Four biologically independent replicates were obtained for each

896 sample. Statistical analysis was performed with one-way ANOVA; “\*” indicates  $0.01 < P$ -value

897  $< 0.05$  and “n.s.” indicates non-significant.

898

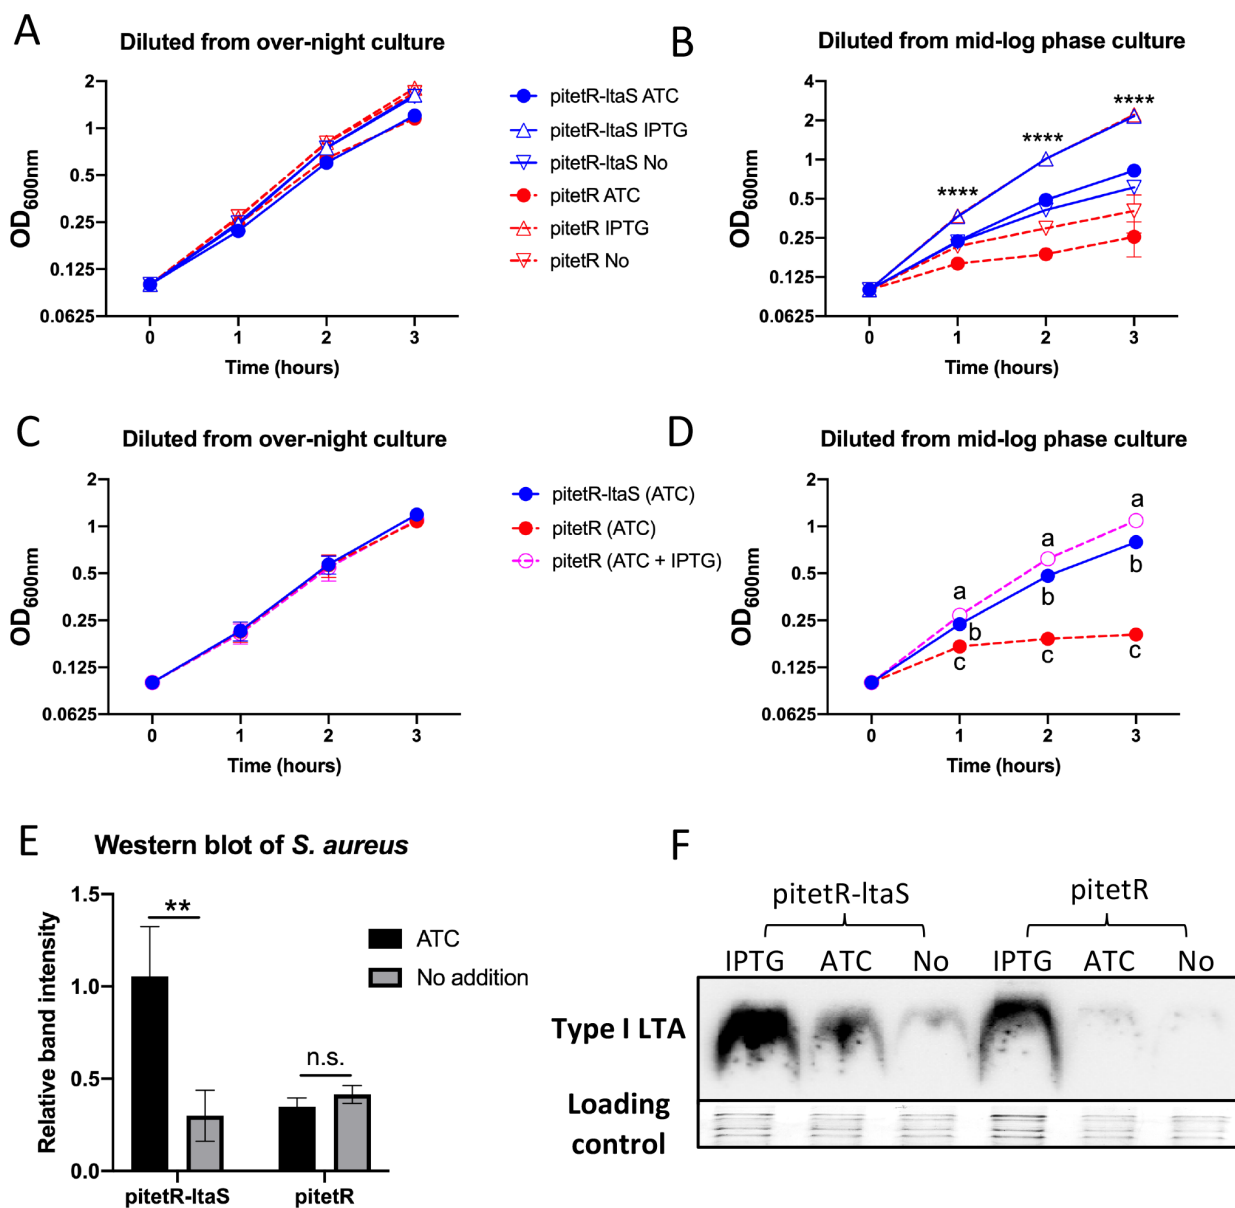

899  
 900 **Fig S2:** *S. mitis ltaS* complements the function of *S. aureus ltaS*. Single colonies of *S. aureus*  
 901 ANG499 strain containing either pitetR-ltaS or pitetR were grown over-night in Tryptic Soy  
 902 broth (TSB) followed by dilution into 0.1 of OD<sub>600nm</sub> with fresh TSB with indicated addition of  
 903 150 ng/ml ATC, 0.5mM IPTG, no addition (No), or both 150 ng/ml ATC and 0.5mM IPTG  
 904 (ATC + IPTG). Values of OD<sub>600nm</sub> were measured every hour for the first 3-hour incubation (A  
 905 & C). Then, cells equal to 1ml of 1.2 OD<sub>600nm</sub> were harvested from each sample for Western blot  
 906 analysis (E & F); in the same time, another dilution same as describe above was performed,

907 followed with continued incubation for another 3 hours and measurement of OD<sub>600nm</sub> values  
908 every hour (B & D). For E, band intensities were normalized to that of sample pitetR-ltaS (ATC)  
909 and loading control. Data shown as plots were obtained from four biologically independent  
910 replicates. Statistical analyses were performed with one-way ANOVA. Significant differences  
911 were shown as “\*\*\*” for  $10^{-1} < P\text{-value} < 10^{-2}$ , “\*\*\*\*\*” for  $P\text{-value} < 10^{-6}$ . Non-significant is  
912 indicated by “n.s.”. For panel D, at time point 1, 2, and 3, statistically different groups were  
913 indicated separately as “a”, “b”, and “c”.  $P\text{-values}$  between each group are all  $< 10^{-6}$ .  
914

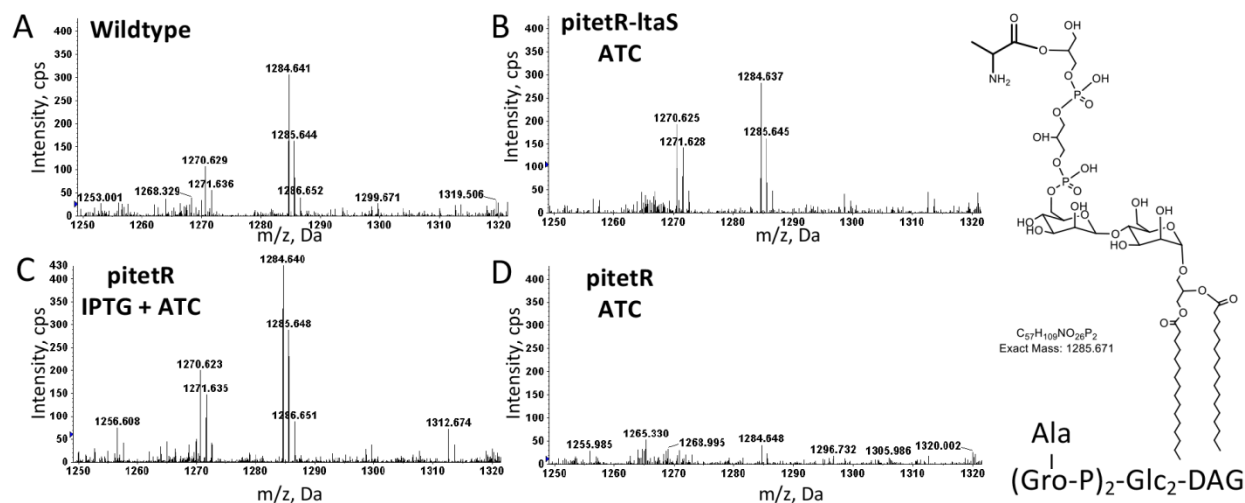

915

916 **Fig. S3:** MS detection of Type I LTA intermediate that contains two Gro-P units with one Ala  
917 modification in the lipid extracts of *S. aureus*. *S. aureus* wildtype (A) and native *ltaS* deficient  
918 strain containing either plasmid *pitetR-ltaS* (*pitetR-ltaS*) (B), or empty vector control (*pitetR*) (C  
919 & D) were incubated to stationary phase in Tryptic Soy broth with the addition of either 150  
920 ng/ml anhydrotetracycline (ATC) or 150 ng/ml ATC with 0.5 mM IPTG as indicated. Total  
921 lipids were extracted with a modified acidic Bligh-Dyer extraction method and analyzed with  
922 NPLC-ESI/MS in the negative ion mode. Shown are the deprotonated  $[M-H]^-$  ions of Type I  
923 LTA intermediate containing two Gro-P units with one Ala modification (retention time: ~23.5-  
924 24.0 min; most abundant  $m/z$  1284.6). Abbreviations: Ala, alanine; Gro-P, glycerophosphate;  
925 Glc, glucosyl; DAG, diacylglycerol.

926

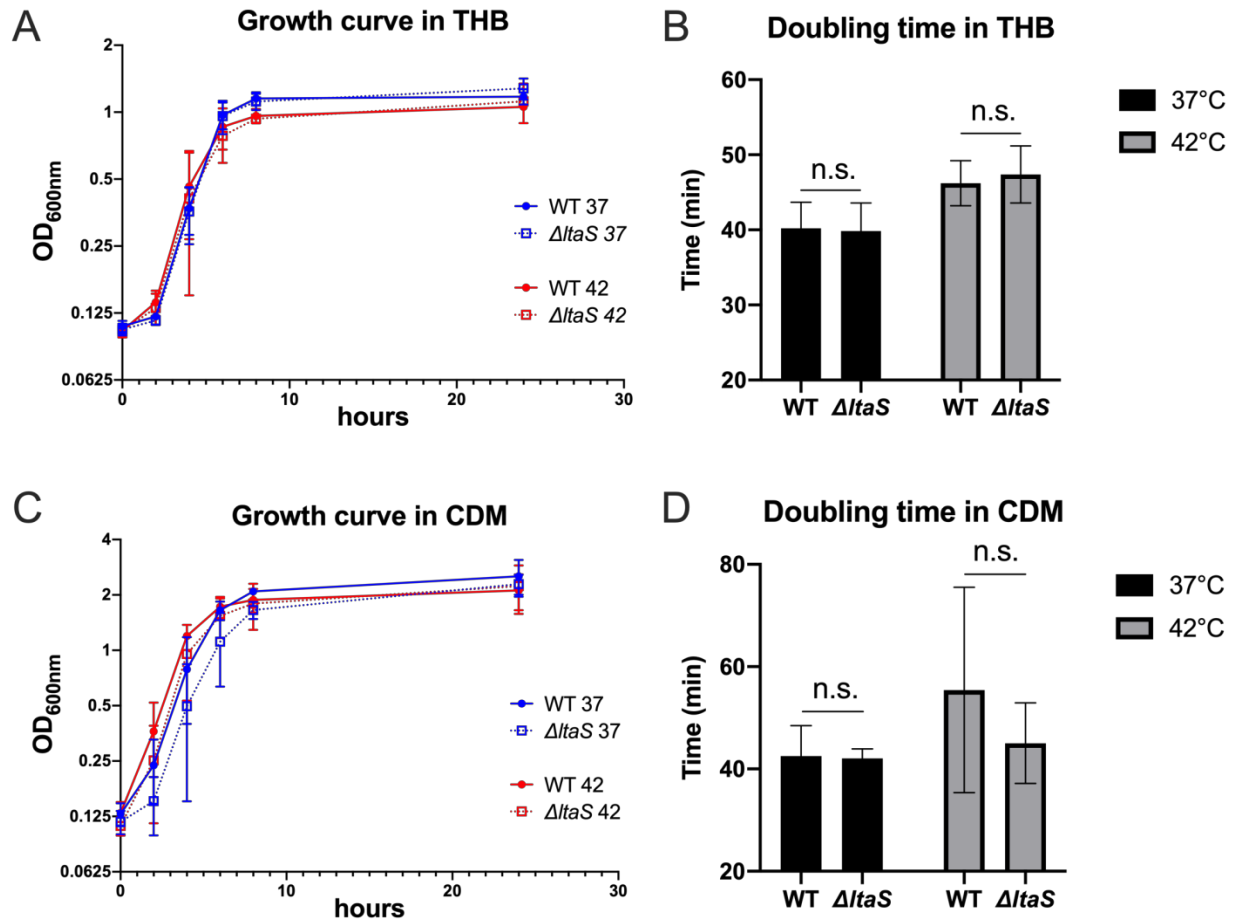

927

928 **Fig. S4:** Growth curve of *S. mitis* under different culture conditions. Single colony of either *S.*  
929 *mitis* ATCC 49456 (SM61) wildtype (WT) or  $\Delta ltaS$  strain cultured overnight in either Todd  
930 Hewitt broth (THB) or chemically defined medium (CDM) were diluted into fresh indicated  
931 medium to an OD<sub>600nm</sub> value of 0.1, followed by incubation at either 37°C (blue lines) or 42°C  
932 (red lines) as indicated in A & C. Values of OD<sub>600nm</sub> were measured at incubation time of 0, 2, 4,  
933 6, 8, and 24 hours. Doubling time shown in B & D was calculated using the OD<sub>600nm</sub> values  
934 acquired at incubation time of 2, 4, and 6 hours. Data presented are mean values from either at  
935 least four (THB) or two (CDM) biological replicates, with standard deviations represented by the  
936 error bars. Statistical analyses were performed with One-way ANOVA; significant difference  
937 was determined by *P*-value < 0.05; “n.s.” represents statistical non-significant.

938 **Table S1:** E-test results of the wildtype and *AltaS* strain of *S. mitis* ATCC 49456 (SM61)

| Strain       | Antimicrobial Agent | MIC Median and                        | S/R <sup>a</sup> |
|--------------|---------------------|---------------------------------------|------------------|
|              |                     | Range<br>( $\mu\text{g/mL}$ )         |                  |
| Wildtype     | Ampicillin          | 0.023 ( $\leq 0.016$ – $\leq 0.023$ ) | S <sup>b</sup>   |
|              | Daptomycin          | 0.1575 (0.094– $\leq 0.25$ )          | NA <sup>c</sup>  |
|              | Vancomycin          | 0.5 (0.38– $\leq 0.75$ )              | S <sup>b</sup>   |
|              | Gentamycin          | 1.0 (0.75– $\leq 1.0$ )               | S <sup>d</sup>   |
|              | Linezolid           | 0.38 (0.38– $\leq 1.0$ )              | S <sup>d</sup>   |
|              | Cefazolin           | 0.19 (0.125– $\leq 0.19$ )            | S <sup>b</sup>   |
| <i>AltaS</i> | Ampicillin          | 0.032 (0.023– $\leq 0.032$ )          |                  |
|              | Daptomycin          | 0.142 (0.094– $\leq 0.19$ )           |                  |
|              | Vancomycin          | 0.5 (0.5–0.5)                         |                  |
|              | Gentamycin          | 1.0 (1.0–1.0)                         |                  |
|              | Linezolid           | 0.5 (0.25– $\leq 0.5$ )               |                  |
|              | Cefazolin           | 0.25 (0.19– $\leq 0.25$ )             |                  |

939 <sup>a</sup> Abbreviations: S, susceptible; R, resistant; NA, not applicable.

940 <sup>b</sup> The European Committee on Antimicrobial Susceptibility Testing. Breakpoint tables for  
 941 interpretation of MICs and zone diameters. Version 10.0, 2020. <http://www.eucast.org>

942 <sup>c</sup> No breakpoint has been established for daptomycin.

943 <sup>d</sup> CLSI. Performance Standards for Antimicrobial Susceptibility Testing. 30<sup>th</sup> ed. CLSI  
 944 supplement M100. Wayne, PA: Clinical and Laboratory Standards Institute; 2020.

945



946 **Table S2:** Primers used in this research

| Names                                                               | Sequences                           | Functions                    |
|---------------------------------------------------------------------|-------------------------------------|------------------------------|
| <i>S. mitis</i> ATCC 49456 <i>cdsA</i> knockout fragment generation |                                     |                              |
| 61cdsA_Up_F                                                         | CCAATCGTCTCCTCAAG                   | Amplify <i>cdsA</i>          |
| 61cdsA_Up_R_Xmal                                                    | ACGTCACCCGGGAAACAAGGTTCTTTTCTG      | upstream<br>fragment         |
| 61cdsA_Dwn_F_Xmal                                                   | ACGTCACCCGGGTTTCCAATCATGCACTTG      | Amplify <i>cdsA</i>          |
| 61cdsA_Dwn_R                                                        | CTCGTTTGTGCCATTTC                   | downstream<br>fragment       |
| <i>S. mitis</i> ATCC 49456 <i>ltaS</i> knockout fragment generation |                                     |                              |
| YW1                                                                 | CCATTCTCATTGACAACCGTATTAACC         | Amplify <i>ltaS</i>          |
| YW15                                                                | CCCTAGCGCTCTCACACAATTACTTCCTAAG     | upstream<br>fragment         |
| YW6                                                                 | ATGATCTGACTAGCTCTGATTTGGAG          | Amplify <i>ltaS</i>          |
| YW16                                                                | GCTACGGATCCAGAGTCGGCAGAAACCG        | downstream<br>fragment       |
| YW13                                                                | ATTGTGTGAGAGCGCTAGGGACCTCTTTAGC     | Amplify                      |
| YW14                                                                | GCCGACTCTGGATCCGTAGCGGTTTTCAAATTTG  | fragment with<br><i>ermB</i> |
| Constructing plasmid pitetR- <i>ltaS</i>                            |                                     |                              |
| pABG5-5                                                             | GGAAAGGGACCTCTCTTCCTAAAC            | Linearize of                 |
| pABG5-3                                                             | GATAAAGGTATTGGTAAATAACAAA           | pABG5                        |
| LtaS_F                                                              | GAGAGGTCCCTTTCCAGGAAGTAATTGTGTGAG   | Amplify <i>ltaS</i>          |
| LtaS_R                                                              | ACCAATACCTTTATCGAAGAGCATTTTTATTGTG  | coding region                |
| YW55                                                                | GTGAGAATCAATTTTAACAAAATC            | Linearize <i>ltaS</i>        |
| YW56                                                                | ACAATTACTTCCTGGAAAG                 | inserted<br>pABG5            |
| Constructing plasmid pitetR empty                                   |                                     |                              |
| YW58                                                                | GAGCATTGAATTCACATGTTACCTCCTTTTGC    | Linearize                    |
| YW59                                                                | GGTAACATGTGAATTCAAATGCTCTTCGATAAAGG | pitetR- <i>ltaS</i>          |
| Constructing plasmid pET- <i>ltaS</i>                               |                                     |                              |
| YW49                                                                | AACATGTATGGTGAGAATCAATTTTAACAAAATC  | Amplify <i>ltaS</i>          |
| YW45                                                                | TCTCGAGTTATTGTGATTTTGATTCCG         | coding region                |
